## REVIEW

# Investigating local and systemic intestinal signalling in health and disease with *Drosophila*

Andre Medina<sup>1,2,\*</sup>, Karen Bellec<sup>1,\*</sup>, Sofia Polcowñuk<sup>1</sup> and Julia B. Cordero<sup>1,2,‡</sup>

## ABSTRACT

Whole-body health relies on complex inter-organ signalling networks that enable organisms to adapt to environmental perturbations and to changes in tissue homeostasis. The intestine plays a major role as a signalling centre by producing local and systemic signals that are relayed to the body and that maintain intestinal and organismal homeostasis. Consequently, disruption of intestinal homeostasis and signalling are associated with systemic diseases and multi-organ dysfunction. In recent years, the fruit fly *Drosophila melanogaster* has emerged as a prime model organism to study tissue-intrinsic and systemic signalling networks of the adult intestine due to its genetic tractability and functional conservation with mammals. In this Review, we highlight *Drosophila* research that has contributed to our understanding of how the adult intestine interacts with its microenvironment and with distant organs. We discuss the implications of these findings for understanding intestinal and whole-body pathophysiology, and how future *Drosophila* studies might advance our knowledge of the complex interplay between the intestine and the rest of the body in health and disease.

**KEY WORDS:** *Drosophila*, Intestine, Disease, Health, Inter-organ communication

## Introduction

The adult intestine of many metazoan animals is a highly regenerative epithelium that acts as a barrier and as a central coordinator of organismal physiology. These vital roles of the intestine are achieved via local interactions with its microenvironment and long-range communication with distant organs. To improve our knowledge of the mechanisms that mediate local and systemic intestinal signals, researchers need a genetically amenable *in vivo* model system in which to study the intestine in the context of its natural microenvironment and as part of a multi-organ complex. Such a model would allow a better understanding of intestinal pathophysiology and its systemic consequences.

The fruit fly *Drosophila melanogaster* has been successfully used as a model organism to study general principles of physiology and disease (Biteau et al., 2011; Naszai et al., 2015; Bilder et al., 2021). Its ‘simpler’ and highly conserved organ system, combined with the availability of superlative genetic tools and biochemical, metabolic

and behavioural assays, have positioned the fruit fly as a unique *in vivo* platform for discovery research and for re-examining long-standing, poorly understood biological phenomena.

Studies in the adult *Drosophila* gastrointestinal tract, which shares structural and functional homology with the mammalian gastrointestinal system (Fig. 1A,B), have shed light on multiple cellular and molecular processes that contribute to intestinal homeostasis, regeneration and tumourigenesis (Jiang et al., 2016; Colombani and Andersen, 2020; Bilder et al., 2021), and that mediate the regulation of host immunity (Ferguson and Foley, 2021), metabolism (Kim et al., 2021b) and behaviour (Cai et al., 2021; Hadjieconomou et al., 2020) by the intestine.

The adult fly gut consists of an epithelial monolayer that forms a cylindrical structure divided into three main regions: the foregut, the midgut and the hindgut (Fig. 1A) (Miguel-Aliaga et al., 2018). The foregut encompasses the pharynx, the oesophagus and the crop (see Glossary, Box 1), an organ involved in food storage. The midgut, akin to the mammalian small intestine, extends from the cardia (Box 1) to the junction with the hindgut, where the Malpighian tubules (Box 1) (Dow and Davies, 2001) connect to the gut. The hindgut, similarly to the mammalian large intestine, fulfils the excretory functions of the fly gastrointestinal system.

To counteract the loss of epithelial cells, the *Drosophila* midgut epithelium relies on the self-renewing capacity of intestinal stem cells (ISCs) to maintain basal tissue homeostasis and to repair the intestinal epithelium upon damage. Following division, each ISC gives rise to a new ISC and to a progenitor cell, either an enteroblast (EB; Box 1) (Ohlstein and Spradling, 2006; Micchelli and Perrimon, 2006) or a pre-enteroendocrine cell (pre-EE cell; Box 1) (Zeng and Hou, 2015; Li et al., 2017; Guo and Ohlstein, 2015; Chen et al., 2018). EBs differentiate into nutrient-absorbing enterocytes (ECs; Box 1) in a Notch signalling (Box 1)-dependent manner (Micchelli and Perrimon, 2006; Ohlstein and Spradling, 2006), while pre-EE cells differentiate into hormone-secreting enteroendocrine (EE) cells (Box 1) (Zeng and Hou, 2015; Beehler-Evans and Micchelli, 2015). Although the *Drosophila* intestinal epithelium possesses a simpler stem cell lineage than that of mammals, the overall cellular functions and molecular principles that dictate ISC proliferation and differentiation are highly conserved between flies and mammals. These similarities include, for example, the origin and function of Wnt and epidermal growth factor (EGF)-like ISC niche (Box 1) components (Buchon et al., 2010; Biteau and Jasper, 2011; Jardé et al., 2020; Perochon et al., 2018), and the role of Wnt, Src and Hippo signalling in adult intestinal regeneration and tumourigenesis (Cordero et al., 2014; Gregorieff et al., 2015; Guillermin et al., 2021; Kohlmaier et al., 2015; Ren et al., 2010; Shaw et al., 2010; Staley and Irvine, 2010; Taniguchi et al., 2015; Yui et al., 2018; Perochon et al., 2018).

Here, we review *Drosophila* research on local and whole-body signalling that is coordinated by the adult intestine and how this

<sup>1</sup>Wolfson Wohl Cancer Research Centre, Institute of Cancer Sciences, University of Glasgow, Garscube Estate, Switchback Road, Glasgow G61 1QH, UK. <sup>2</sup>CRUK Beatson Institute, Institute of Cancer Sciences, University of Glasgow, Garscube Estate, Switchback Road, Glasgow G61 1BD, UK.

\*These authors contributed equally to this work

‡Author for correspondence (julia.cordero@glasgow.ac.uk)

 J.B.C., 0000-0003-1701-9480

This is an Open Access article distributed under the terms of the Creative Commons Attribution License (<https://creativecommons.org/licenses/by/4.0>), which permits unrestricted use, distribution and reproduction in any medium provided that the original work is properly attributed.

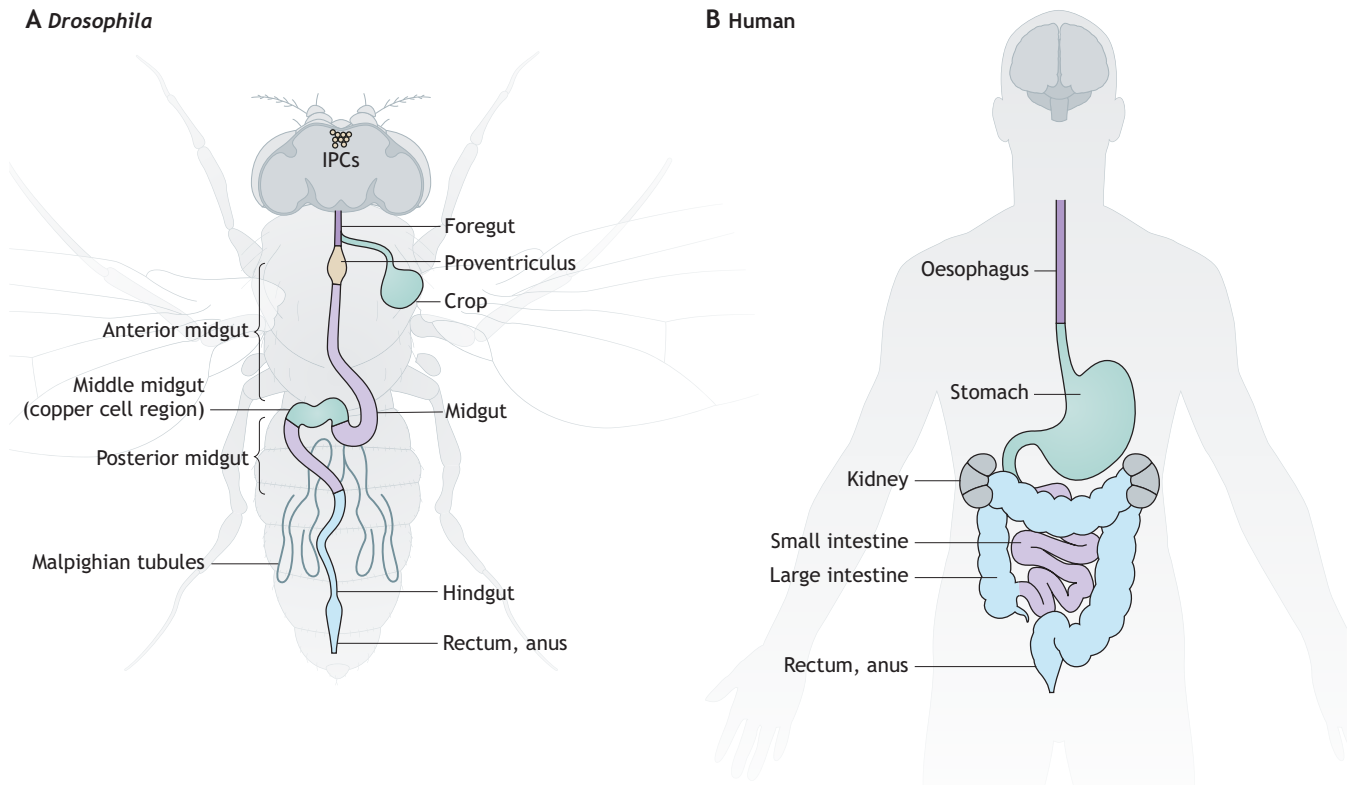

**Fig. 1. Comparison of gastrointestinal tract anatomy between adult *Drosophila melanogaster* and humans.** (A,B) The adult *Drosophila* (A) and human (B) gastrointestinal tracts share structural and functional homology. Organs and/or tissues that share the same physiological functions are represented in the same colour. In A, top is anterior and shows the location of the insulin-producing cells (IPCs). The copper cell region (Box 1) and crop are shown in the same colour to reflect that both structures share functional similarities with the human stomach.

research informs our understanding of intestinal pathophysiology and its systemic implications. We focus primarily on work on the adult midgut, which is the best functionally characterised compartment of the *Drosophila* gut.

#### Intestinal-microenvironment interactions in *Drosophila*

The mammalian intestinal epithelium is ensheathed by a complex subepithelial or mesenchymal microenvironment that is composed of diverse cell types, including stromal cells, muscle cells, various fibroblast subtypes, pericytes and endothelial cells, all of which secrete multiple factors. These factors – often referred to as niche factors – instruct ISCs to proliferate and to differentiate during homeostasis and during injury-induced regeneration of the intestinal epithelium (Kim et al., 2020; Greicius et al., 2018; McCarthy et al., 2020; Stzpourginski et al., 2017; Shoshkes-Carmel et al., 2018; Valenta et al., 2016; Degirmenci et al., 2018; Holloway et al., 2021; Jardé et al., 2020). Bowel disorders, such as inflammatory bowel disease (IBD) and colorectal cancer (CRC), are linked to the defective cellular composition of the intestinal mesenchyme and/or to the abnormal production of secreted factors from this mesenchyme (Kinchen et al., 2018; Roulis et al., 2014, 2020; Katajisto et al., 2008; Shao et al., 2006). This emphasises the importance of understanding the interactions between the intestinal epithelium and the individual mesenchymal cell subtypes that nurture ISCs. However, the cellular and molecular complexity of the subepithelial microenvironment of the mammalian intestine has made it difficult to identify and functionally characterise individual cells and signalling components in this system. This has been made possible only recently through technological advances in imaging, single-cell RNA sequencing, organoid co-cultures and complex

mouse genetic experiments (Holloway et al., 2021; Kim et al., 2020; McCarthy et al., 2020). The simpler nature of the *Drosophila* gut and its subepithelial microenvironment, as well as the diverse and large genetic toolkit available for *Drosophila*, have contributed to key discoveries about intestinal-microenvironment interactions in this model organism (Table 1) with implications to human health and disease (Perochon et al., 2021; Tamamouna et al., 2021; Kim et al., 2021b).

#### Intestinal-visceral muscle crosstalk in *Drosophila*

The *Drosophila* intestine is surrounded by the visceral muscle (Box 1; Fig. 2A,B), which represents the best-characterised component of the subepithelial/mesenchymal-like compartment of the adult fly midgut. In addition to its canonical role in the regulation of intestinal peristalsis, the visceral muscle has been extensively characterised for its function as the source of essential ISC niche factors, including the EGF-like ligand Vein, the Wnt ligand Wingless (Wg), JAK/STAT (also known as Hop/Stat92E) signalling ligands, BMP-like ligands and *Drosophila* insulin-like peptide 3 (dILP3; also known as Ilp3) (Biteau and Jasper, 2011; Buchon et al., 2010; Cordero et al., 2012b; Jiang et al., 2011; Lin et al., 2008, 2010; O'Brien et al., 2011; Xu et al., 2011; Guo et al., 2013). These ligands are secreted by the visceral muscle and act in a paracrine manner to activate their cognate receptors in ISCs and to induce ISC proliferation to fulfil the epithelium's demand for new differentiated cells, in response to diverse stimuli.

Egfr/Ras/MAPK signalling activity in ISCs is required to maintain the homeostatic self-renewing capacity of the intestinal epithelium (Biteau and Jasper, 2011; Xu et al., 2011). Following intestinal damage, the expression of EGF-like ligands, Vein and

**Box 1. Glossary**

- **Angiocrine factors:** endothelial cell-derived secreted molecules that stimulate organ growth and remodelling in homeostatic conditions or upon damage/pathology.
- **Bursicon- $\alpha$  (Burs):** insect-specific neuropeptide hormone expressed in enteroendocrine cells and neuronal cells.
- **Cardia:** also known as proventriculus; a structure at the junction between the foregut and midgut where the midgut and the crop merge. It functions as a valve to allow the passage of food into the anterior midgut and crop.
- **Copper cell region:** acidic region in the middle midgut. Together with the crop, this structure is often referred to as the fly 'stomach'.
- **Corpora cardiaca:** neuroendocrine tissue functionally analogous to human pancreatic  $\alpha$ -cells. In *Drosophila*, it is located at the side of the aorta and produces Adipokinetic hormone (Akh), a glucagon-like molecule.
- **Crop:** an enlarged structure in the foregut suggested to have a role in food storage, digestion and microbial control.
- **Dysbiosis:** disruption or alteration of the gut microbiota homeostasis.
- **Endothelial tip cells:** leading cells in the mammalian vascular system that are located at the tip of vascular sprouts and play a key role in angiogenesis. Endothelial tip cells are highly plastic and regulate vascular remodelling.
- **Enteroblasts (EBs):** intestinal progenitor cells derived from intestinal stem cell division that are able to differentiate into absorptive enterocytes.
- **Enterocytes (ECs):** intestinal absorptive cells with a simple columnar epithelial shape. ECs secrete digestive enzymes and are involved in the absorption and transport of nutrients.
- **Enteroendocrine (EE) cells:** intestinal secretory cells that arise from the differentiation of pre-enteroendocrine cells. EEs are best known for producing peptide hormones, which are secreted into the circulation and regulate the function of distant organs within the body.
- **Immune deficiency (IMD) pathway:** an innate immune pathway known to regulate the activity of the *Drosophila* NF- $\kappa$ B-like protein Relish and the production of anti-microbial peptides.
- **Intestinal stem cell (ISC) niche:** the specific intestinal microenvironment that controls ISC behaviour.
- **Malpighian tubules:** pair of tubular structures in arthropods, at the junction between the midgut and the hindgut, which fulfil excretory functions comparable to those of the mammalian kidneys.
- **Myosuppressin (Ms):** a muscle function-inhibiting peptide expressed mainly in neuronal cells.
- **Notch signalling:** a conserved intercellular communication pathway involved in a wide range of cellular processes, such as cell fate specification, cell differentiation and cell proliferation.
- **Pre-enteroendocrine (pre-EE) cells:** ISC progeny committed to becoming an EE cell after differentiation.
- **Target of rapamycin (Tor):** an evolutionarily conserved kinase that promotes cell and tissue growth by coupling growth factors to nutrient availability.
- **Visceral muscle:** muscle that surrounds the epithelium of the gastrointestinal tract and is involved in the peristalsis process, a wave-like muscular contraction important for digestion, pathogen clearance and the transport of ingested food along the intestinal tract.

Spitz, are upregulated in the visceral muscle and in epithelial EBs, respectively (Jiang et al., 2011). The intramembrane protease Rhomboid, which is responsible for the cleavage and consequent activation of EGF ligands, is also upregulated in epithelial ECs, which are in close contact with EBs and the visceral muscle (Jiang et al., 2011) (Fig. 2B). This results in the activation of Egfr signalling in stem/progenitor cells and in ISC proliferation, which is required to regenerate the damaged intestinal epithelium.

The *in vivo* functional characterisation of a mesenchymal source of Wnt ligand, which is required to maintain ISC self-renewal, was first reported in the adult *Drosophila* midgut (Lin et al., 2008). Wnt from the visceral muscle appears, however, redundant

for regenerative ISC proliferation, which instead depends on damage-induced epithelial Wnt/Wg, secreted by EBs in the intestinal epithelium (Cordero et al., 2012b). Follow-up work in the mammalian intestine identified similar requirements for mesenchymal or epithelial sources of Wnt ligands in intestinal homeostasis and regeneration (Suh et al., 2017; Zou et al., 2018; Aoki et al., 2016; Gregorieff et al., 2005; Valenta et al., 2016).

A key conserved pathway that has been extensively studied in the adult *Drosophila* midgut, and that is required to drive ISC proliferation and differentiation, is JAK/STAT signalling (Zhou et al., 2013; Jiang et al., 2009, 2011; Lin et al., 2010). Interleukin-like cytokines and the JAK/STAT signalling ligands Unpaired 1 and 3 (Upd1 and Upd3) are expressed in the midgut visceral muscle (Lin et al., 2010) and are highly induced in midgut epithelial ECs in response to intestinal damage or stress (Zhou et al., 2013; Jiang et al., 2009) (Fig. 2B). Although the role of muscle-derived Upd remains unclear, epithelium-derived Upd3 drives midgut regeneration by activating JAK/STAT signalling in ISCs/EBs (Jiang et al., 2009; Zhou et al., 2013). Upd3 also activates JAK/STAT signalling in the visceral muscle, which stimulates the production of the EGF-like ligands Spitz and Vein in progenitor cells and in the visceral muscle itself (Zhou et al., 2013; Jiang et al., 2011) (Fig. 2B). Spitz and Vein then activate Egfr signalling in ISCs and promote ISC proliferation. Upd1 and Upd3 released from the midgut epithelium upon damage also induce the secretion of Decapentaplegic (Dpp), a member of the bone morphogenetic protein (BMP) family, from the visceral muscle (Fig. 2B). This results in the activation of BMP signalling in the midgut epithelium (Guo et al., 2013). As in mammals, muscle-derived BMP and the subsequent activation of BMP signalling in the intestinal epithelium restrain, rather than activate, ISC proliferation (Guo et al., 2013). Therefore, JAK/STAT–BMP signalling crosstalk is key for the return of ISCs to basal proliferation levels following intestinal injury.

Intestinal carcinomas highjack microenvironmental factors and tissue-regeneration programmes to sustain their growth (Medema and Vermeulen, 2011; Ashton et al., 2010; Myant et al., 2013a,b; Cordero et al., 2014). Similarly, intestinal tumours in *Drosophila* exploit EGF-like and JAK/STAT signalling ligands, derived from the intestinal epithelium and visceral muscle, to fuel ISC hyperproliferation and tumour progression (Jiang et al., 2011; Cordero et al., 2012a; Patel et al., 2015; Song et al., 2019; Ngo et al., 2020) (Fig. 2B).

Pioneering work in *Drosophila* has revealed a pivotal role for hormone secretory EE cells in the control of intestinal homeostasis through paracrine signalling to the subepithelial microenvironment of the midgut. By releasing hormones such as Tachykinin (Tk) and Bursicon- $\alpha$  (Burs) (Box 1), EE cells induce insulin-like dILP3 expression (via Tk) and decrease EGF-like Vein expression (via Burs) in the visceral muscle (Amcheslavsky et al., 2014; O'Brien et al., 2011; Scopelliti et al., 2014) (Fig. 2B). dILP3 production by the visceral muscle induces insulin receptor activation in ISCs and promotes diet-induced proliferation of the midgut epithelium (Amcheslavsky et al., 2014; O'Brien et al., 2011), while the decrease in Vein in the visceral muscle, via Burs, maintains ISC quiescence in homeostatic conditions (Scopelliti et al., 2014).

Mammalian EE cells are well known for their ability to sense intestinal microbiota and microbial metabolites. This sensing capability enables EE cells to secrete hormones, which regulate visceral muscle contraction and gut motility in response to intestinal microbiota and microbial metabolites (Nozawa et al., 2009). This

**Table 1. Summary of the signalling factors secreted from the adult *Drosophila* midgut to associated and distant tissues**

| Gut-associated tissue interactions |          |                  |                                                                                                                 |                                                                                                             |                                                               |
|------------------------------------|----------|------------------|-----------------------------------------------------------------------------------------------------------------|-------------------------------------------------------------------------------------------------------------|---------------------------------------------------------------|
| Source (gut epithelium)            |          | Target tissue    | Effect of the signalling                                                                                        |                                                                                                             |                                                               |
| Cell type                          | Molecule | Cell type/tissue | Homeostasis                                                                                                     | Damage and/or tumourigenesis                                                                                | References                                                    |
| EE                                 | Tk       | VM               | Increases the production of dILP3 in the VM, which activates insulin signalling in ISCs and their proliferation | –                                                                                                           | Amcheslavsky et al., 2014; O'Brien et al., 2011               |
|                                    | Burs     | VM               | Decreases Vein in the VM, which maintains ISC quiescence                                                        | –                                                                                                           | Scopelliti et al., 2014                                       |
|                                    | DH31     | VM               | –                                                                                                               | Increases VM contractility and clearing of gut bacteria                                                     | Benguettat et al., 2018                                       |
| EC                                 | ROS      | TTCs             | –                                                                                                               | Increases tracheal remodelling, which in turn induces ISC proliferation                                     | Perochon et al., 2021; Tamamouna et al., 2021                 |
|                                    | Upd1,3   | VM               | –                                                                                                               | Increase Vein and Dpp production in the VM, which in turn induce or inhibit ISC proliferation, respectively | Zhou et al., 2013; Jiang et al., 2011, 2009; Guo et al., 2013 |
| ISC; EB and EC                     | FGF      | TTCs             | –                                                                                                               | Increases tracheal remodelling, which in turn induces ISC proliferation                                     | Perochon et al., 2021; Tamamouna et al., 2021                 |

  

| Gut–body interactions |                  |                  |                                                                                 |                                                                                               |                                                         |                                                         |
|-----------------------|------------------|------------------|---------------------------------------------------------------------------------|-----------------------------------------------------------------------------------------------|---------------------------------------------------------|---------------------------------------------------------|
| Source                |                  | Targeted organ   | Effect of the signalling                                                        |                                                                                               |                                                         |                                                         |
| Organ                 | Molecule         | Targeted organ   | Homeostasis                                                                     | Damage and/or tumourigenesis                                                                  | References                                              |                                                         |
| Gut epithelium        | D-serine         | Brain/neurons    | Promotes longer and deeper sleep by inhibiting arousal rate                     | –                                                                                             | Dai et al., 2019                                        |                                                         |
|                       | CCHa1            | Brain/neurons    | Increases sleep depth                                                           | –                                                                                             | Titos and Rogulja, 2020 preprint                        |                                                         |
|                       |                  | Burs             | Brain/neurons                                                                   | Promotes feeding by targeting Ms <sup>+</sup> neurons, which induces crop extension           | –                                                       | Hadjieconomou et al., 2020                              |
|                       |                  | Brain/neurons    | Controls systemic metabolism by decreasing energy waste                         | –                                                                                             | Scopelliti et al., 2018                                 |                                                         |
|                       | NPF              | Brain/neurons    | Regulates systemic metabolism by inducing the secretion of dILPs from the brain | –                                                                                             | Yoshinari et al., 2021                                  |                                                         |
|                       |                  | CC               | Controls systemic metabolism by decreasing energy waste                         | –                                                                                             | Yoshinari et al., 2021                                  |                                                         |
|                       | AstC             | Ovaries          | Promotes GSC proliferation                                                      | –                                                                                             | Ameku et al., 2018                                      |                                                         |
|                       |                  | CC               | Controls systemic metabolism by promoting mobilisation of energy stores         | –                                                                                             | Kubrak et al., 2022                                     |                                                         |
|                       | CNMamide         | Brain/neurons    | Induces the preference for food sources rich in essential AAs                   | –                                                                                             | Kim et al., 2021a                                       |                                                         |
|                       | Upd2             | Brain/neurons    | –                                                                               | Inhibits olfactory discrimination and aversion behaviour towards food that contains pathogens | Cai et al., 2021                                        |                                                         |
|                       | Upd3             | Brain/neurons    | –                                                                               | Inhibits olfactory discrimination and aversion behaviour towards food that contains pathogens | Cai et al., 2021                                        |                                                         |
|                       | ImpL2            | Skeletal muscles | –                                                                               | –                                                                                             | Tissue wasting                                          | Ding et al., 2021                                       |
|                       |                  | Fat body         | –                                                                               | –                                                                                             | Tissue wasting                                          | Ding et al., 2021                                       |
|                       |                  | Ovaries          | –                                                                               | –                                                                                             | Tissue wasting                                          | Kwon et al., 2015; Figueroa-Claresvega and Bilder, 2015 |
|                       |                  | Fat body         | –                                                                               | –                                                                                             | Tissue wasting                                          | Kwon et al., 2015; Figueroa-Claresvega and Bilder, 2015 |
| Pvf1                  | Skeletal muscles | –                | –                                                                               | Tissue wasting                                                                                | Kwon et al., 2015; Figueroa-Claresvega and Bilder, 2015 |                                                         |
|                       | Fat body         | –                | –                                                                               | Tissue wasting                                                                                | Song et al., 2019                                       |                                                         |
| Citrate               | Testis           | –                | Promotes spermatogenesis and increased food intake                              | –                                                                                             | Song et al., 2019                                       |                                                         |
|                       | –                | –                | –                                                                               | –                                                                                             | Hudry et al., 2019                                      |                                                         |

Gut-secreted molecules and their place of signal reception within the intestinal microenvironment (top) or peripheral organs (bottom) are listed. AA, amino acid; AstC, Allatostatin C; Burs, Bursicon- $\alpha$ ; CC, corpora cardiaca; CCHa1, CCHamide 1; Dh31, Diuretic hormone 31; dILP, *Drosophila* insulin-like peptide; Dpp, Decapentaplegic; EB, enteroblast; EC, enterocyte; EE, enteroendocrine cell; FGF, Fibroblast growth factor; GSC, germline stem cell; ImpL2, Ecdysone-inducible gene L2; ISC, intestinal stem cell; Ms, Myosuppressin; NPF, Neuropeptide F; Pvf1, PDGF- and VEGF-related factor 1; ROS, reactive oxygen species; Tk, Tachykinin; TTC, terminal tracheal cell; Upd1,2,3, Unpaired 1, 2 and 3; VM, visceral muscle.



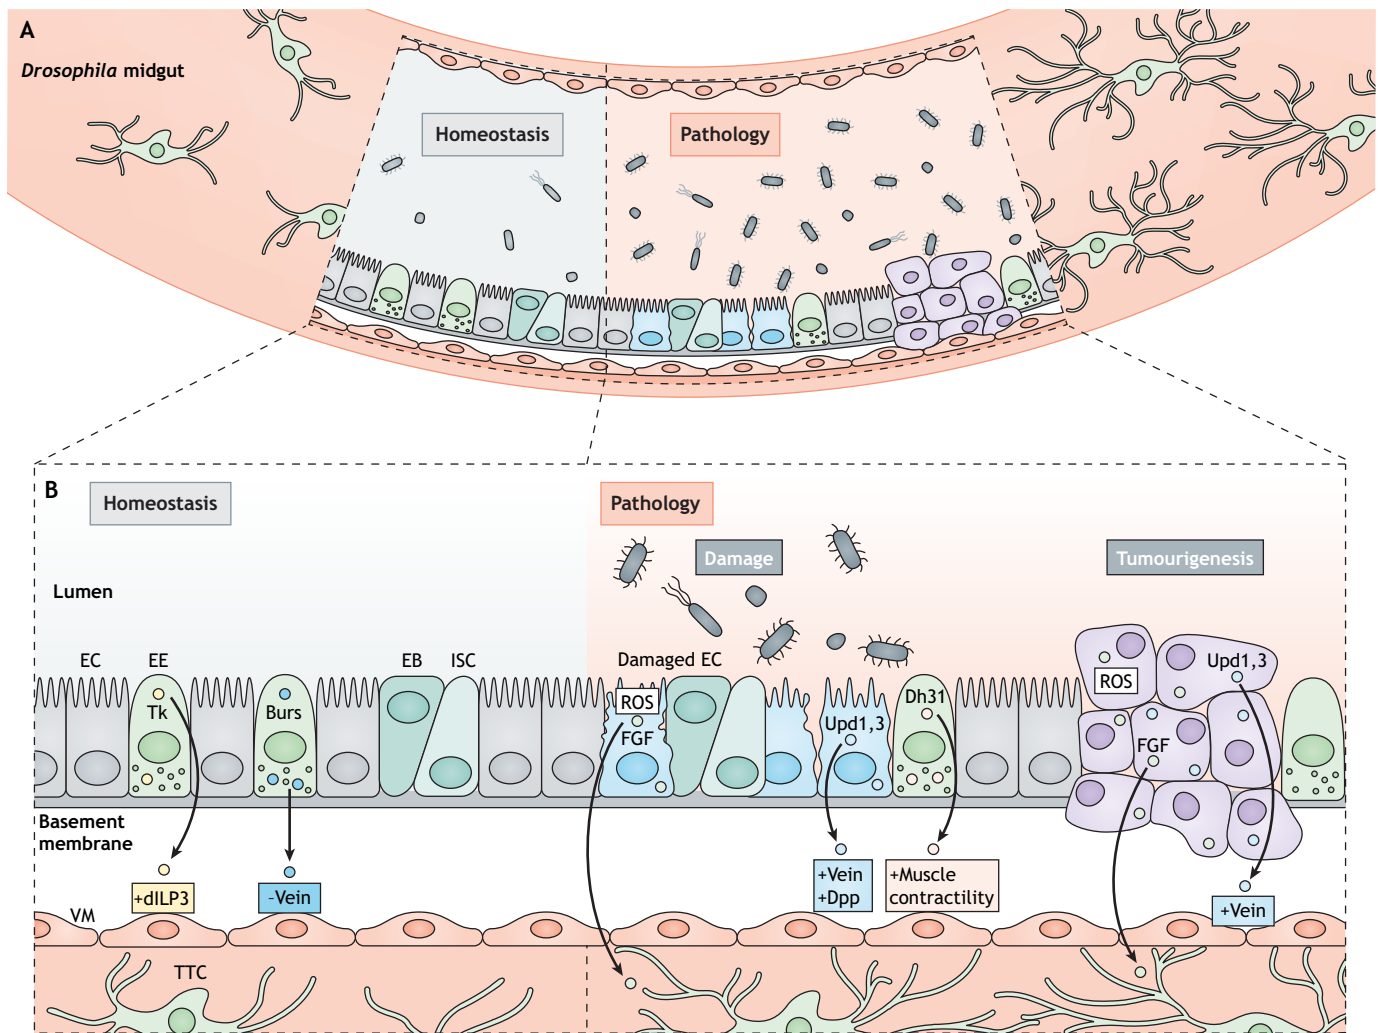

**Fig. 2. Signalling from the adult *Drosophila* midgut to its subepithelial microenvironment.** (A) Schematic representation of the adult midgut epithelium and associated VM and TTCs. (B) Signalling from the intestinal epithelium to the VM and TTCs in homeostatic conditions (left), upon damage or infection (middle) and in tumorigenesis (right). In homeostatic conditions (B, left), EEs secrete Tk and Burs. Tk induces the VM to express dILP3, and Burs reduces the expression of the EGF-like ligand Vein in the VM. dILP3 promotes ISC proliferation, while repression of Vein maintains ISC quiescence. In conditions of intestinal infection or damage (B, middle), EEs secrete Dh31, which signals to the VM and induces muscle contractility to evict opportunistic bacteria from the gut. Upd3 produced by ECs stimulates the VM to secrete Vein to promote ISC proliferation. Upd1 and Upd 3 secreted by ECs also induce the release of Dpp from the VM, which restores ISC quiescence after damage. ROS and FGF from ECs activate FGF signalling in gut-associated TTCs, which induces tracheal remodelling and ISC proliferation. In tumorigenesis (B, right) Upd1 and Upd3 produced by ECs stimulate the VM to secrete Vein to promote ISC proliferation. Tumour-derived ROS and FGF activate FGF signalling in gut-associated TTCs, inducing tracheal remodelling and ISC proliferation. Burs, Bursicon- $\alpha$ ; Dh31, Diuretic hormone 31; dILP3, *Drosophila* insulin-like peptide 3; Dpp, Decapentaplegic; EB, enteroblast; EC, enterocyte; EE, enteroendocrine cell; EGF, Epidermal growth factor; FGF, Fibroblast growth factor; ISC, intestinal stem cell; ROS, reactive oxygen species; Tk, Tachykinin; TTC, terminal tracheal cell; Upd1,3, Unpaired 1 and 3; VM, visceral muscle.

function of EE cells is conserved in the *Drosophila* midgut. Upon infection by opportunistic bacteria, intestinal reactive oxygen species (ROS) induce the activation of the ion channel TrpA1 in a subset of EE cells, which then secrete Diuretic hormone 31 (Dh31), an orthologue of the human calcitonin gene-related peptides (CGRPs). Dh31 binds to its receptor expressed in the visceral muscle to induce visceral muscle contraction and the clearing of gut bacteria (Benguettat et al., 2018) (Fig. 2B).

Recent findings in mice show that secretory lineage precursors, including EE precursors, are highly plastic and contribute to the homeostatic and regenerative self-renewal of the mammalian intestinal epithelium (Tomic et al., 2018; Ishibashi et al., 2018). We anticipate that current and future findings in *Drosophila* will shed light on the mechanisms that mediate this crucial role of EE cells in the maintenance of intestinal integrity.

### Intestinal-vascular interactions in adult *Drosophila*

Endothelial cells, an integral constituent of the vertebrate vasculature, are a key component of the intestinal microenvironment (McCarthy et al., 2020; Kinchen et al., 2018; Roulis et al., 2020; Kim et al., 2020). Cellular and molecular changes in endothelial cells occur in CRC, IBD and during tissue regeneration (Perochon et al., 2021; Ippolito et al., 2016; Nolan et al., 2013; Palikuqi et al., 2020). It is, therefore, important to characterise the contribution of endothelial cells and the vasculature to adult intestinal health using *in vivo* functional studies, which currently constitutes a research area of unmet need.

Owing to the open nature of its circulatory system, the *Drosophila* model does not possess a blood-transporting vasculature, which is a key difference from mammals. However, *Drosophila* has a tracheal system akin to the mammalian respiratory and vascular systems,

which consists of a branched tubular network that provides oxygen to tissues throughout the fly body (Ghabrial et al., 2003). Terminal tracheal cells (TTCs), which are equivalent to mammalian endothelial tip cells (Box 1) (del Toro et al., 2010), are highly plastic cells that can extend cytoplasmic projections towards their target tissues in order to maximise oxygen delivery. Mimicking the extensive vascularisation of the mammalian intestine, the adult *Drosophila* gut is surrounded by a dense tracheal network and represents an attractive *in vivo* paradigm for the study of intestinal–vascular interactions (Li et al., 2013; Perochon et al., 2021; Tamamouna et al., 2021).

A conserved molecular signature mediates remodelling of the developing *Drosophila* trachea and vascular remodelling and angiogenesis in mammals. Most significantly, both systems are influenced by the oxygen content of their associated tissues, which regulates the activity of *Drosophila* Similar (Sima) or of its mammalian orthologue, hypoxia-inducible factor-1 $\alpha$  (HIF-1 $\alpha$ ) (Centanin et al., 2008, 2010; Rey and Semenza, 2010; Luo et al., 2019; Liu et al., 2018). Reduced oxygen levels activate Sima/HIF-1 $\alpha$ , which induces the production of *Drosophila* Fibroblast growth factor (FGF; also known as Bnl) or mammalian vascular endothelial growth factor (VEGF), leading to the paracrine activation of FGF receptor (FGFR; also known as Btl) signalling in trachea (Centanin et al., 2010) or VEGF receptor (VEGFR) in the vasculature (Rey and Semenza, 2010), respectively. Developmental tracheal remodelling in *Drosophila* also depends on nutrient availability, through modulation of the insulin signalling pathway (Linneweber et al., 2014). Similarly, insulin signalling activation in endothelial cells plays important roles in mammalian vascular physiology and pathology (Vicent et al., 2003).

Recent studies have identified the cellular and molecular basis of a reciprocal crosstalk between the adult trachea and the fly midgut, which is required to induce ISC proliferation during midgut regeneration following damage (Perochon et al., 2021; Tamamouna et al., 2021) (Fig. 2B). ROS, produced by the intestinal epithelium in response to damage caused by pathogenic bacteria, activate a HIF-1 $\alpha$ /FGF/FGFR programme in the intestinal epithelium and associated tracheal tissue, ultimately leading to intrinsic changes in gene expression within TTCs, including the production of angiocrine factors (Box 1), which are necessary to induce tracheal remodelling and ISC proliferation in the midgut (Perochon et al., 2021; Tamamouna et al., 2021). Conversely, Dpp secretion from the trachea restrains ISC proliferation in *Drosophila* (Li et al., 2013).

Vascular remodelling is recognised as a cancer hallmark (Hanahan and Weinberg, 2000). Similarly, tumorigenesis in the *Drosophila* intestine and in other fly epithelia is associated with a substantial expansion of tracheal tissue (Grifoni et al., 2015; Tamamouna et al., 2021). Interestingly, intestinal tumours in *Drosophila* hijack regenerative midgut–tracheal signalling to induce tracheal remodelling in support of their growth (Tamamouna et al., 2021). Surprisingly, the vasculature remains a remarkably understudied component of the mammalian intestinal microenvironment. Although limitations may be imposed by the inherent differences between the *Drosophila* trachea and the mammalian circulatory system, evidence suggests that studies of midgut–tracheal interactions are likely to lead to the discovery of new biological concepts concerning the regulation and role of the vasculature, including its interaction with other components of the intestinal microenvironment, in intestinal health and disease.

Studies in mammals have demonstrated the importance of immune cells in physiological vascularisation and wound healing,

and in cancer-associated angiogenesis (Fantin et al., 2010; Lin et al., 2006; Jetten et al., 2014; Lucas et al., 2010). ISC niche factors, such as Wnt ligands, are secreted by macrophages to promote mouse intestinal regeneration following injury (Saha et al., 2016). However, the role of the vasculature in macrophage-induced intestinal regeneration has not been established. In *Drosophila*, macrophage-like haemocytes promote the regenerative proliferation of ISCs in the adult midgut. They do so via the secretion of Upd3 and Dpp ligands, which activate JAK/STAT and BMP signalling, respectively (Ayyaz et al., 2015; Chakrabarti et al., 2016). Haemocytes are closely associated with the adult *Drosophila* tracheal system (Sanchez Bosch et al., 2019). Inter-organ communication studies in *Drosophila* could therefore provide a powerful *in vivo* platform in which to address immune cell–vasculature–intestinal interactions during intestinal regeneration and tumorigenesis.

### Inter-organ communication between the intestine and distant tissues

In addition to its role in digestion and nutrient absorption, the adult intestine fulfils major endocrine, metabolic and immune functions for the body (Brierley et al., 2021; Nauck et al., 1993; Rothhammer et al., 2018), which are largely achieved via complex signalling crosstalk between the intestine and distant organs. Owing to the well-recognised connection between the intestine and systemic dysfunction, including metabolic (Larraufie et al., 2019; Lund et al., 2011) and nervous system disorders (Gomez-Nguyen et al., 2021; Wan et al., 2021), a growing number of researchers are investigating the mechanisms that underlie these signalling networks. However, functional studies of inter-organ communication can be challenging in mammals due to their intricate physiology and genetic redundancy. Despite its evolutionary distance and less complex organ system, *Drosophila* has emerged as an invaluable model for studying inter-organ signalling and the regulation of whole-body function by the adult intestine in physiology and pathology (Fig. 3A,B and Table 1), which we discuss next.

### Gut–neuronal communication

The gut–brain axis is a bidirectional signalling network that communicates the gastrointestinal tract to the nervous system. An increasing amount of evidence indicates that a strong correlation exists between neurological disorders, such as stress, depression and autism, and intestinal dysfunction (Wan et al., 2021; Gomez-Nguyen et al., 2021; Mengoni et al., 2021; Yuan et al., 2021). This is especially true of changes in the gut microbiota, which is considered to be a major mediator of the gut–brain axis. The gut microbiota generate chemical signals that act on the central nervous system. These signals are either secreted into the bloodstream and reach the brain by crossing the blood–brain barrier, or they act indirectly, through signalling via intestinal cells, immune cells or enteric neurons (Wikoff et al., 2009; Berer et al., 2011; Buckley et al., 2020). Microbial signals exert long-range effects by targeting neuronal cell function and altering host physiology and behaviour (Morais et al., 2021). Numerous recent reviews describe in detail the role of the microbiota in the gut–brain axis (Morais et al., 2021; Rutsch et al., 2020; Margolis et al., 2021; Jacobson et al., 2021; Schroeder and Bäckhed, 2016). Here, we discuss what is known about how non-microbial gut-derived signals, which in some cases might be influenced by the microbiota, affect host systemic homeostasis.

Long-term observations have linked the intestine with host physiology, metabolism and behaviour. For example, locomotor

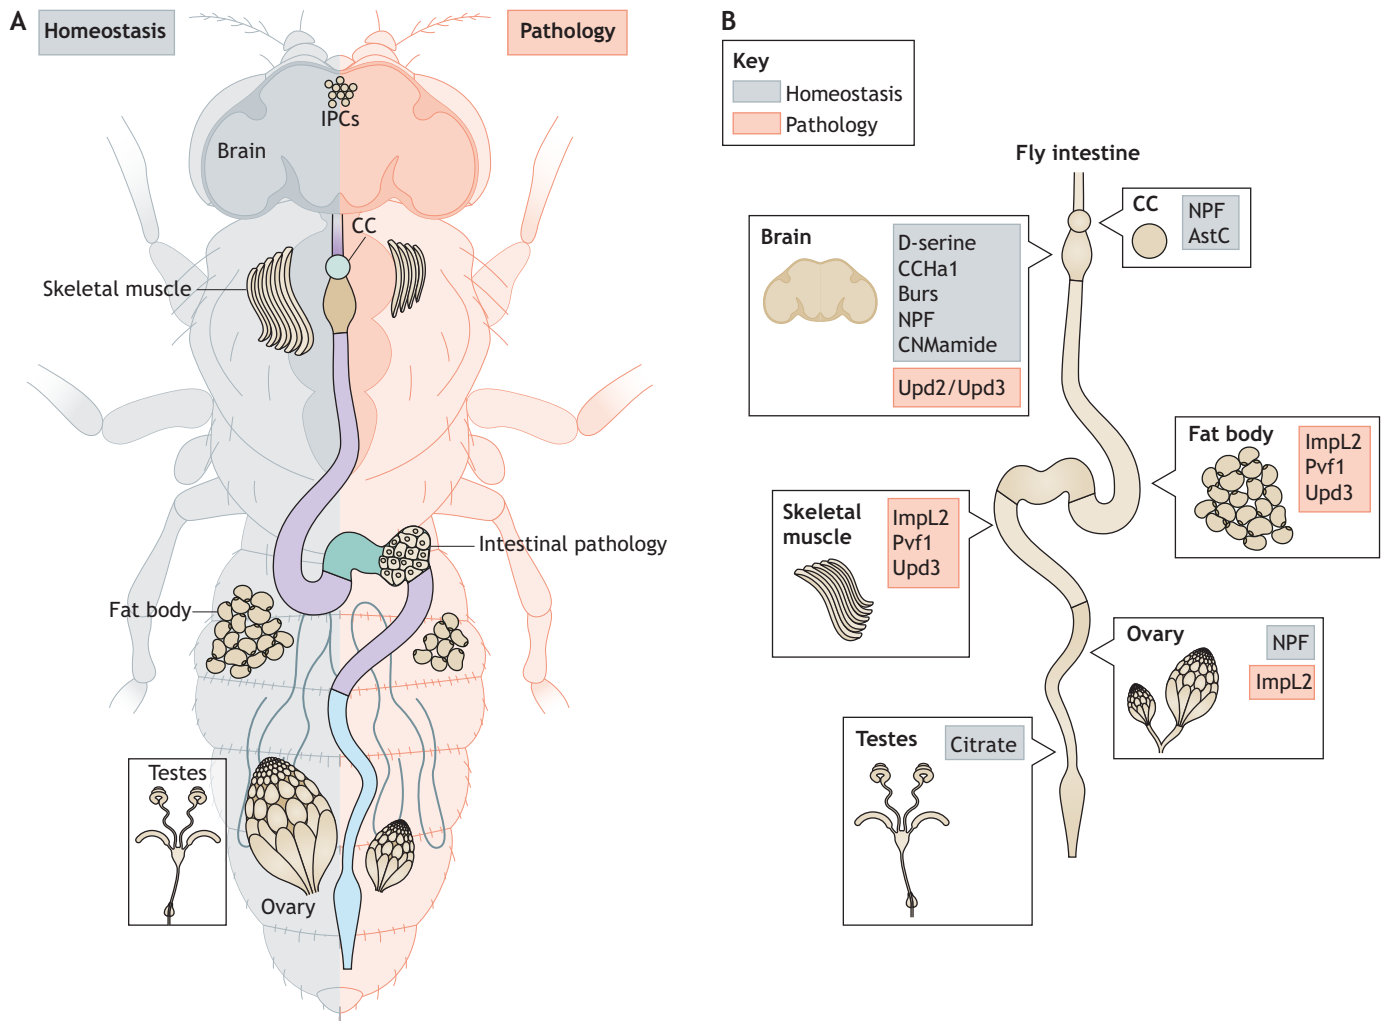

**Fig. 3. Signalling from the adult *Drosophila* gut to distant organs in physiology and pathology.** (A) Adult *Drosophila* gut and peripheral tissues in normal physiological (left) and pathological (right) conditions. The diminished size of peripheral tissues on the right side represents organ wasting caused by signals from intestinal tumours. (B) Intestinal-derived molecules signal to peripheral tissues in physiological conditions (grey) or in pathological conditions (red). In normal physiological conditions, D-serine, CCHa1 and CNMamide, which are secreted from the gut upon nutritional inputs, regulate sleep and/or locomotor activity. EE-derived peptide hormones, Burs and NPF, signal to Myosuppressin-producing neurons and IPCs in the brain to regulate feeding behaviour and the release of dILPs, respectively. EE-derived Burs, NPF and AstC also regulate the production and release of Akh/glucagon from the CC, affecting energy storage in the fat body. Mating and nutrition affect gamete production via NPF signalling to ovaries and via citrate signalling to testes. In pathological conditions, such as enteric infection, or upon ageing, Upd2 and Upd3 are secreted from the gut and activate JAK/STAT signalling in glial cells, affecting olfactory neurons and olfaction. Upd3, Pvf1 and ImpL2 secreted from intestinal tumours induce cachexia-like wasting of skeletal muscle, fat body and ovaries. Akh, Adipokinetic hormone; AstC, Allatostatin C; Burs, Bursicon- $\alpha$ ; CC, corpora cardiaca; CCHa1, CCHamide 1; dILPs, *Drosophila* insulin-like peptides; EE, enteroendocrine cell; IPCs, insulin-producing cells; ImpL2, Ecdysone-inducible gene L2; JAK/STAT, Janus kinase/signal transducer and activator of transcription; NPF, Neuropeptide F; Pvf1, PDGF- and VEGF-related factor 1; Upd2,3, Unpaired 2 and 3.

activity and sleep are directly associated with organismal nutritional status. Nutrient-deprived animals are well known to be more active and to suppress sleep (Yu et al., 2016; Keene et al., 2010; Danguir and Nicolaidis, 1979; Hua et al., 2018). Recent studies in the fly gut are beginning to shed light on the mechanisms behind this universally recognised phenomenon. Amino acid (AA) consumption is a key factor in the regulation of sleep. The nonessential AA L-serine is converted in the intestine to D-serine by the enzyme Serine racemase, which is expressed in ECs. Evidence suggests that D-serine synthesised by the fly gut is a co-agonist of N-methyl-D-aspartate receptor 1 (Nmdar1), a subtype of glutamate receptor, which, when activated in the brain, promotes longer and deeper sleep by inhibiting arousal rate (Dai et al., 2019). An additional gut-controlled mechanism that modulates arousal threshold during sleep in *Drosophila* has been suggested in a

recent preprint, which describes how sensing of dietary AAs by EE cells induces the production and secretion of the neuropeptide CCHamide 1 (CCHa1), which binds to its cognate receptor in dopaminergic neurons, increasing sleep depth (Titos and Rogulja, 2020 preprint) (Fig. 3B and Table 1).

EE cells are well-known mediators of sugar sensing by the intestine, a function that is conserved between *Drosophila* and mammals (Yoshinari et al., 2021; Buchanan et al., 2022; Scopelliti et al., 2018). Recent studies in *Drosophila* have delineated multi-organ signalling relays that link sugar sensing by EE cells with systemic physiological outputs. *Drosophila* Burs is produced by a subpopulation of EE cells in the adult midgut (Scopelliti et al., 2014), which, when stimulated by dietary sugars, secrete Burs into the circulation. Activation of Burs receptor, dLGR2 (also known as Rk), in neurons, leads to the impairment of glucagon-like secretion



and favours the storage of energy resources in the fat body (Fig. 3B and Table 1) (Scopelliti et al., 2018), an organ analogous to the mammalian liver and adipose tissue (Gutierrez et al., 2007). A similar role in the regulation of systemic metabolism has been assigned to *Drosophila* Neuropeptide F (NPF), a midgut-derived EE peptide hormone orthologous to mammalian neuropeptide Y (NPY). In the case of NPF, its sugar-induced secretion from EE cells preserves organismal energy resources by restraining glucagon-like secretion and inducing dILP secretion from the brain (Yoshinari et al., 2021) (Fig. 3B and Table 1).

New insights from *Drosophila* suggest that the gut is capable of relaying host physiological changes to the nervous system, beyond an organism's nutritional status. Pioneering work in *Drosophila* has demonstrated that sex and reproductive state have a significant impact on gut physiology (Hudry et al., 2016; Reiff et al., 2015; Ahmed et al., 2020). Following mating, the number of differentiated cells, including Burs-secreting EE cells, undergo a significant expansion in the adult female midgut (Hadjieconomou et al., 2020). Increased levels of Burs activate its receptor on Myosuppressin (Ms; Box 1)-producing neurons in the brain (Fig. 3B and Table 1), inducing Ms release after mating. Ms neurons, which innervate the crop, promote muscle crop extension and increased food consumption (Hadjieconomou et al., 2020). This evidence suggests that the intestine and EE cell function are core regulators of the feeding behaviour that is necessary to sustain a metabolically demanding process such as reproduction. Recent work in mice has also delineated a neuronal circuit that influences sugar preference regulated by unidentified gut signals (Tan et al., 2020). The role of EE cells as nutrient sensors (Yoshinari et al., 2021; Scopelliti et al., 2018) and regulators of feeding behaviour in *Drosophila* (Hadjieconomou et al., 2020) points toward them being prime candidates in the regulation of refined feeding decisions, including dietary choices in mammals. Consistently, work published while this article was under review demonstrates that cholecystokinin (CCK)-producing EE cells in mice can differentiate between sugars and sweeteners and, in response, transduce these signals to the brain to modulate the preference for the consumption of caloric sugars (Buchanan et al., 2022).

Although EE cells are emerging as predominant translators of gut states to the brain, recent evidence has revealed new, unsuspected players in this essential intestinal role. Germ-free or AA-deprived flies undergo increased expression of the neuropeptide CNMamide in midgut ECs, which activates CNMamide receptor-expressing neurons, inducing the animal's preference for food sources that are rich in essential AAs (Kim et al., 2021a) (Fig. 3B and Table 1). Furthermore, conditions that lead to a chronic inflammatory state in the *Drosophila* intestine, such as ageing and infection, induce the expression and release of the JAK/STAT signalling ligands Upd2 and Upd3 from midgut ECs, leading to the activation of JAK/STAT signalling in ensheathing glial cells (EGs). EGs communicate with olfactory neurons, and activation of JAK/STAT signalling in these cells inhibits olfactory discrimination and aversion behaviour towards food that contains pathogens (Cai et al., 2021) (Fig. 3B and Table 1).

Overwhelming evidence associates intestinal function with behavioural responses and emotional states (Wan et al., 2021; Gomez-Nguyen et al., 2021; Mengoni et al., 2021; Yuan et al., 2021). Reciprocally, enteric nervous system (ENS) disorders such as Hirschsprung's disease, Parkinson's disease and autism are associated with defects in gut motility (Chaidez et al., 2014; Cersosimo et al., 2013; Bethell et al., 2016). Despite recent progress in the cellular characterisation of the mammalian ENS

(Drokhlyansky et al., 2020), and the significant work being done on the involvement of the microbiota in the gut–brain axis (Jacobson et al., 2021; Margolis et al., 2021; Morais et al., 2021; Rutsch et al., 2020), the mechanistic basis of these phenomena remains largely unknown.

*Drosophila* has provided invaluable insights into the role of the ENS in intestinal stem/progenitor cell differentiation (Han et al., 2015), epithelial integrity (Kenmoku et al., 2016), and the control of fluid homeostasis, excretion (Cognigni et al., 2011; Dus et al., 2015) and food consumption (Cognigni et al., 2011; Hadjieconomou et al., 2020; Oh et al., 2021; Olds and Xu, 2014; Wang et al., 2020) by the intestine. Neurological disorders have been successfully modelled in *Drosophila* (Mizuno et al., 2010; Tauber et al., 2011). Therefore, fruit fly research might be of key importance for improving our mechanistic knowledge of gut–nervous system crosstalk and its implications in human pathophysiology.

### Gut–reproductive system interactions

Gut communication with the reproductive tract is highly dependent on signalling initiated in the gonads, which can be influenced by the mating status of a fly (White et al., 2021; Ahmed et al., 2020). However, changes in the microbiota, sex differences and mating are also responsible for significant gut alterations, which are in turn highly important for reproductive success (Mallott et al., 2020; Zhang et al., 2021; Ahmed et al., 2020; White et al., 2021).

A range of studies in *Drosophila* have provided invaluable insights into the reciprocal signalling between the adult gut and reproductive organs. The release of male-derived Sex Peptide (SP) in the seminal fluid during mating promotes signalling from the female gonads to the intestine, via a mechanism involving 20-hydroxy-ecdysone (20HE; also known as ImpE2) and Juvenile hormone (JH; also known as Jhe). These molecules signal to their cognate receptors in ISCs and alter gut physiology to maximise gamete production (Ahmed et al., 2020; White et al., 2021; Reiff et al., 2015; Ameku et al., 2018; Zipper et al., 2020). Mating-induced intestinal remodelling is responsible for gut growth via increases in ISC proliferation and EC number (White et al., 2021). Gut expansion is also accompanied by metabolic rewiring of ECs and by the upregulation of genes involved in fatty acid synthesis and AA uptake (White et al., 2021; Reiff et al., 2015). These changes are coupled with changes in feeding behaviour to increase food intake and preference for energy-rich diets (Hadjieconomou et al., 2020; Carvalho-Santos et al., 2020), which are essential for supporting fecundity and the energy demands of egg production.

Intrinsic changes in gut physiology caused by mating also influence gametogenesis. A new role for the conserved peptide hormone NPF has been proposed to promote germline stem cell (GSC) proliferation in the germarium via signalling from the midgut EE cells to the ovaries (Ameku et al., 2018) (Fig. 3B). Whereas virgin females retain NPF in EE cells, mated ones release the hormone into the circulation (the haemolymph) to activate NPF receptor (NPF<sub>R</sub>) in the ovaries and to induce GSC division via the activation of Dpp/BMP signalling (Ameku et al., 2018). Given the recently described role of gut-derived NPF in nutrient sensing and energy metabolism (Yoshinari et al., 2021), it is reasonable to speculate that NPF and EE cells in general may act to couple GSC proliferation and reproductive success to nutrient availability. Consistent with this idea, genetically induced tumourigenesis and age-dependent dysplasia of the fly midgut, which is more prevalent in mated females (Hudry et al., 2016; Ahmed et al., 2020), have a profound effect on gut architecture, cell differentiation and the expression of digestive enzymes (Patel et al., 2015; Karpac et al.,



2013; Tauc et al., 2021). This may possibly alter nutrient uptake and the expression of gut hormones, consequently inducing organ wasting and affecting gamete production and life span (Kwon et al., 2015).

As well as the mating status in females, male gonads can also influence intestinal epithelial cell biology, to support their own needs. *Drosophila* testes control sex differences in intestinal EC carbohydrate metabolism. These differences occur due to a male-biased secretion of Upd from the testis, which induces the paracrine activation of JAK/STAT signalling in midgut ECs and leads to the upregulation of genes involved in carbohydrate metabolism and the production of tricarboxylic acid cycle intermediates, such as citrate, by the intestine (Fig. 3B). Intestinal citrate is in turn required to promote spermatogenesis and increased food intake (Hudry et al., 2019). Although some reports in the literature correlate intestinal disease with reproductive dysfunction, this remains a controversial and hugely understudied area of medical research (Mayberry and Weterman, 1986; Johnson et al., 2004; Pedersen et al., 2013), to which *Drosophila* studies could make vital contributions.

### Gut communication with other metabolic tissues

The intestine plays a key role in the control of whole-body metabolism (Table 1). Loss of intestinal epithelial homeostasis or disruption of the microbiota in mammals induce intestinal inflammation, alterations in lipid absorption, and the development of obesity and metabolic syndrome (Chassaing et al., 2014, 2015; DeBosch et al., 2014; Kaliannan et al., 2013; Li et al., 2016), which contribute to insulin resistance and type 2 diabetes. Evidence of improved glycaemic levels and of type 2 diabetes remission in obese patients that have undergone gastric bypass surgery (Pories et al., 1995) has provided one of the most iconic examples of the influence of the gut on systemic metabolic homeostasis. Both direct and indirect signalling from the intestine to metabolic organs have been reported in *Drosophila* larvae and adults. However, consistent with the focus of this Review, we only discuss here work involving the adult fly gut.

*Drosophila* is a highly informative model in which to study human metabolic disorders, including obesity, dietary-induced insulin resistance and type 2 diabetes (Birse et al., 2010; Na et al., 2013; Hirabayashi et al., 2013; Sanaki et al., 2020; Lourido et al., 2021; Pereira et al., 2018; Musselman et al., 2011). Not surprisingly, the fly intestine plays a considerable role as a master regulator of systemic metabolism, through tightly regulated and complex inter-organ communication networks, involving the gut, ovaries, corpora cardiaca (CC; Box 1), fat body, skeletal muscles and the brain (Fig. 3A,B) (Meschi and Delanoue, 2021; Chatterjee and Perrimon, 2021; Carvalho-Santos et al., 2020). This inter-organ crosstalk is highly dependent on organismal nutritional status and the secretion of hormones by specialised organs. The CC produces glucagon-like Adipokinetic hormone (Akh), which, together with *Drosophila* dILPs produced by neurons in the brain, plays a pivotal role in regulating glucose and lipid mobilisation and in energy storage in the fat body (Chatterjee and Perrimon, 2021; Mattila and Hietakangas, 2017).

In *Drosophila*, the intrinsic functions of the intestinal epithelium, such as robust nutrient absorption and nutrient sensing, are crucial for regulating systemic metabolic homeostasis. EE cells play a key role as sensors of intestinal luminal content and, in response to it, secrete peptide hormones into the circulation as signals to fine-tune metabolic processes (Scopelliti et al., 2018; Yoshinari et al., 2021; Song et al., 2017). As discussed in the ‘Gut–neural communication’ section of this Review, EE-produced Burs

and NPF peptide hormones are involved both in gut–neural signalling and in signalling to metabolic tissues (Yoshinari et al., 2021; Scopelliti et al., 2018) (Fig. 3B and Table 1). Furthermore, a recent article reports that the somatostatin-like peptide hormone Allatostatin C (AstC), secreted by EE cells, plays a complementary role to that of Burs and NPF in the control of systemic metabolism (Kubrak et al., 2022). The starvation-induced repression of Target of rapamycin (Tor; Box 1) increases the production and secretion of AstC by EE cells, which signals to its receptor AstC-R2 in the CC (Fig. 3B and Table 1). This in turn induces AKH secretion and the mobilisation of energy stores from the fat body to prevent hypoglycaemia and to sustain organismal well-being during nutrient stress (Kubrak et al., 2022).

The intrinsic regulation of nutrient absorption by the *Drosophila* intestine can also be controlled by local signalling from EE-derived hormones. Tk, one of the most abundant EE hormones in the *Drosophila* midgut, regulates intestinal lipid metabolism by signalling through its receptor Tkr99D in ECs and by suppressing the transcription factor Sterol regulatory element binding protein (SREBP), leading to decreased midgut lipogenesis (Song et al., 2014). Depletion of Tk from EE cells results in the accumulation of lipid droplets in ECs and an increase in systemic fat content (Song et al., 2014).

Only a few of the several *Drosophila* EE-secreted peptides have a direct vertebrate orthologue, which represents a potential limitation of the model system. However, and most importantly, the biological function of EE cells is largely conserved in *Drosophila*. This includes their molecular characteristics, sensory properties and ability to signal locally and systemically (Guo et al., 2021; Gribble and Reimann, 2016; Gehart et al., 2019). Altogether, the work discussed here highlights the invaluable conceptual insights obtained from *Drosophila* on the roles of the adult intestine in controlling tissue-intrinsic and systemic metabolic homeostasis.

### Systemic effects of gut dysfunction

When the homeostasis of the intestinal epithelium is disrupted, it has a direct impact on this epithelium’s key roles, including its barrier function, its nutrient absorption capacity and production of digestive enzymes, its sensing of external cues and its secretion of peptide hormones (Karpac et al., 2013; Modrzynska et al., 2021; Zhou and Boutros, 2020; Chang et al., 2017). The use of *Drosophila* as a model system in which to study gut microbiota, chronic intestinal infection, inflammation and CRC is helping to address significant gaps in our understanding of the mechanisms that mediate multiple whole-body manifestations of gut dysfunction.

Enteric bacteria provide nutrients to the host and play an important role in the modulation of local and systemic metabolism (Leitão-Gonçalves et al., 2017; Consuegra et al., 2020; Chaston et al., 2014). Microbe-free flies show an increase in intestinal and systemic lipid stores. However, this phenomenon can be reversed when flies are colonised by single bacterial strains of some species but not others, through a mechanism that involves glucose oxidation and bacterial glucose utilisation (Chaston et al., 2014). Additionally, bacterial-derived molecules, such as peptidoglycan and acetate, activate *Drosophila*’s innate immunity through the induction of Tumour necrosis factor (TNF; also known as Egr)-like immune deficiency (IMD) pathway (Box 1) in the intestine (Kamareddine et al., 2018; Charroux et al., 2018; Zugasti et al., 2020). This results in the activation of NF- $\kappa$ B and the production of anti-microbial peptides (Liehl et al., 2006). The long- and short-term intestinal activation of IMD due to bacterial infection or to intestinal dysbiosis (Box 1) in *Drosophila* have been associated with a decreased life span,

metabolic changes in the gut and systemic organ wasting (Fig. 3A) (Chakrabarti et al., 2014; Charroux et al., 2018; Zugasti et al., 2020; Paredes et al., 2011). Although the mechanisms that underlie these phenomena have not been fully identified, increasing evidence points to a key role of the IMD pathway and EE cell-derived Tk. The microbial-derived short-chain fatty acid acetate can induce the activation of the IMD pathway in EE cells and can positively modulate the expression of Tk in the midgut (Kamareddine et al., 2018; Jugder et al., 2021). As previously mentioned in this Review, the increased expression of Tk can decrease intestinal lipogenesis (Song et al., 2014). This could be directly or indirectly associated with the depletion of energy stores in the fat body, which is also observed upon IMD activation and increased Tk production by EE cells. Interestingly, the production of ROS by Dual oxidase (Duox) in *Drosophila*, a well-known mechanism of defence against intestinal microbes, is modulated by metabolic reprogramming of ECs (Chakrabarti et al., 2014; Lee et al., 2018). Duox is controlled by a signalling cascade that ultimately leads to lipid catabolism. Hence, constitutive activation of intestinal Duox could be involved in the depletion of lipids from ECs during bacterial infection (Lee et al., 2018). As Tk is known to reduce lipogenesis in ECs through SREBP (Song et al., 2014), it is likely that Tk could also be involved in the control of Duox activation.

Other intestinal pathologies, such as tumours, inflammation and age-related dysplasia, are commonly associated with systemic instability (Karpac et al., 2013; Zhou and Boutros, 2020; Chassaing et al., 2015). Hyperproliferative cells in adult fly midgut tumours compete for space in the basal membrane, promoting EC delamination and apoptosis, and driving the secretion of inflammatory cytokines (Upd1, Upd2, Upd3) and the induction of stress signalling in the intestine (Zhou and Boutros, 2020; Patel et al., 2015; Cordero et al., 2012a). These events disrupt the epithelium's barrier function, the loss of which is linked to intestinal dysbiosis, systemic infection, systemic immune activation and metabolic alterations (Zhou and Boutros, 2020; Rera et al., 2012), which ultimately have an impact on organismal life span (Zhou and Boutros, 2020; Zhou et al., 2021). Similarly to the phenomenology associated with intestinal bacterial infection (Song et al., 2014; Kamareddine et al., 2018) and tumourigenesis (Zhou and Boutros, 2020; Kwon et al., 2015), age-related intestinal dysplasia is associated with intestinal dysbiosis, deficient intestinal lipid absorption, reduction of systemic lipid stores and systemic immune activation (Karpac et al., 2013; Guo et al., 2014).

Intestinal cancer-related systemic manifestations include the peripheral organ-wasting syndrome cachexia (Fearon et al., 2011). In contrast to anorexia, cachexia can rarely be reversed by increased feeding. Cancer patients suffering from this disorder experience poor quality of life, low response to treatment and reduced survival (Baracos et al., 2018). *Drosophila* intestinal models of cachexia have contributed to our understanding of the genetics and systemic mechanisms involved in this disorder. Hyperactivation of the *Drosophila* Yap1 orthologue, Yorkie (Yki), alone or in combination with oncogenic Ras in adult ISCs, induces midgut hyperplasia and considerable wasting of peripheral tissues, including of skeletal muscle, the fat body and the ovaries (Kwon et al., 2015; Song et al., 2019). This phenomenon is caused by secreted factors, such as the insulin antagonist Ecdysone-inducible gene L2 (ImpL2) (Kwon et al., 2015; Figueroa-Clavevega and Bilder, 2015), the inflammatory cytokine Upd3 (Ding et al., 2021) and PDGF- and VEGF-related factor 1 (Pvfl) (Song et al., 2019), which are secreted from intestinal tumours and activate signalling via their cognate receptors in peripheral tissues to induce tissue wasting (Fig. 3A,B).

Intestinal damage and tumourigenesis are also associated with significant alterations to the integrity of epithelial tissue caused by aberrant cell proliferation, cell death and defective cell differentiation (Patel et al., 2015; Tauc et al., 2021; Barresi et al., 2015; Sansom et al., 2004). The extent to which these intrinsic defects in intestinal cell homeostasis contribute to systemic effects remains unclear. *Drosophila* intestinal Yki tumours show a striking reduction in the number of EE cells and, consequently, of gut hormones. However, impaired EE cell differentiation, following the overexpression of constitutively active Notch in ISCs, had no effect on preventing tissue wasting (Song et al., 2019). This suggests that EE cell loss alone is not sufficient to induce cachectic-like, systemic wasting by the intestine. By contrast, an increase in the proportion of EE cells has been described in aging intestines (Tauc et al., 2021), upon loss of commensal microbiota (Broderick et al., 2014), and following intestinal DNA damage, oxidative stress or inflammation (Lin et al., 2010; He et al., 2018; Dai et al., 2020). Alterations in EE cells and their secreted hormones have also been observed in human IBD (Worthington et al., 2018; Harrison et al., 2013; Modrzynska et al., 2021). *Drosophila* may provide an ideal system in which to address the still-elusive role of EE cells in the pathophysiology of IBD and other intestinal disorders.

### Conclusion and perspectives

How do signals to and from the intestine integrate to sustain tissue-intrinsic and whole-body homeostasis? The work discussed here highlights the magnificent contributions that research in *Drosophila* has made towards addressing such a fundamental question.

Intestinal pathology is often associated with greatly debilitating organismal imbalance – including metabolic disease and mental illness – through largely unknown mechanisms. Although their small size and lack of a robust organoid-like system for *in vitro* growth of intestinal cells impose clear limitations for biochemical studies in the fly intestine, the future is bright for *Drosophila* as an amenable and affordable high-throughput *in vivo* platform to unravel complex signalling crosstalk between multiple tissues and organs. Furthermore, recent technologies in single-cell transcriptomics with which to analyse every organ and cell type (Li et al., 2022), as well as unparalleled options of binary genetic systems with which to temporally and spatially control gene expression, are already revolutionising the field (Deng et al., 2019; Ariyapala et al., 2020; Kockel et al., 2019; Lim et al., 2021). Additionally, pathway analysis tools (Song et al., 2019) and powerful quantitative metabolic (Scopelliti et al., 2018), physiological (Cognigni et al., 2011; Hadjieconomou et al., 2020) and behavioural (Titos and Rogulja, 2020 preprint; Leitão-Gonçalves et al., 2017) approaches equip *Drosophila* research to make ground-breaking discoveries in intestinal biology, and to further our understanding of how the intestine interacts with and influences its micro- and macro-environment in health and disease.

### Acknowledgements

We thank the fly community for their invaluable contributions to the field of intestinal biology. We apologise to those colleagues whose work was not discussed due to space restrictions.

### Competing interests

The authors declare no competing or financial interests.

### Funding

Work in the Cordero laboratory is funded by a Wellcome Trust and Royal Society Sir Henry Dale Fellowship (104103/Z/14/Z) and a Cancer Research UK (CRUK) Pioneer Award (A29265) to J.B.C., and CRUK core funding through the CRUK Beatson Institute (A17196).

## References

- Ahmed, S. M. H., Maldera, J. A., Kronic, D., Paiva-Silva, G. O., Pénalva, C., Teleman, A. A. and Edgar, B. A. (2020). Fitness trade-offs incurred by ovary-to-gut steroid signalling in *Drosophila*. *Nature* **584**, 415–419. doi:10.1038/s41586-020-2462-y
- Amcheslavsky, A., Song, W., Li, Q., Nie, Y., Bragatto, I., Ferrandon, D., Perrimon, N. and Ip, Y. T. (2014). Enteroendocrine cells support intestinal stem-cell-mediated homeostasis in *Drosophila*. *Cell Rep.* **9**, 32–39. doi:10.1016/j.celrep.2014.08.052
- Ameku, T., Yoshinari, Y., Texada, M. J., Kondo, S., Amezawa, K., Yoshizaki, G., Shimada-Niwa, Y. and Niwa, R. (2018). Midgut-derived neuropeptide F controls germline stem cell proliferation in a mating-dependent manner. *PLoS Biol.* **16**, e2005004. doi:10.1371/journal.pbio.2005004
- Aoki, R., Shoshkes-Carmel, M., Gao, N., Shin, S., May, C. L., Golson, M. L., Zahm, A. M., Ray, M., Wiser, C. L., Wright, C. V. et al. (2016). Foxl1-expressing mesenchymal cells constitute the intestinal stem cell niche. *Cell Mol. Gastroenterol Hepatol* **2**, 175–188. doi:10.1016/j.jcmgh.2015.12.004
- Ariyapala, I. S., Holsopple, J. M., Popodi, E. M., Hartwick, D. G., Kahsai, L., Cook, K. R. and Sokol, N. S. (2020). Identification of split-GAL4 drivers and enhancers that allow regional cell type manipulations of the *Drosophila melanogaster* intestine. *Genetics* **216**, 891–903. doi:10.1534/genetics.120.303625
- Ashton, G. H., Morton, J. P., Myant, K., Phesse, T. J., Ridgway, R. A., Marsh, V., Wilkins, J. A., Athineos, D., Muncan, V., Kemp, R. et al. (2010). Focal adhesion kinase is required for intestinal regeneration and tumorigenesis downstream of Wnt/c-Myc signaling. *Dev. Cell* **19**, 259–269. doi:10.1016/j.devcel.2010.07.015
- Ayyaz, A., Li, H. and Jasper, H. (2015). Haemocytes control stem cell activity in the *Drosophila* intestine. *Nat. Cell Biol.* **17**, 736–748. doi:10.1038/ncb3174
- Baracos, V. E., Martin, L., Korc, M., Guttridge, D. C. and Fearon, K. C. H. (2018). Cancer-associated cachexia. *Nat. Rev. Dis. Primers* **4**, 17105. doi:10.1038/nrdp.2017.105
- Barresi, V., Reggiani Bonetti, L. and Bettelli, S. (2015). KRAS, NRAS, BRAF mutations and high counts of poorly differentiated clusters of neoplastic cells in colorectal cancer: observational analysis of 175 cases. *Pathology* **47**, 551–556. doi:10.1097/PAT.0000000000000300
- Beehler-Evans, R. and Micchelli, C. A. (2015). Generation of enteroendocrine cell diversity in midgut stem cell lineages. *Development* **142**, 654–664. doi:10.1242/dev.114959
- Benguettat, O., Jneid, R., Soltys, J., Loudhaief, R., Brun-Barale, A., Osman, D. and Gallet, A. (2018). The DH31/CGRP enteroendocrine peptide triggers intestinal contractions favoring the elimination of opportunistic bacteria. *PLoS Pathog.* **14**, e1007279. doi:10.1371/journal.ppat.1007279
- Berer, K., Mues, M., Koutouros, M., Rasbi, Z. A., Boziki, M., Johnner, C., Wekerle, H. and Krishnamoorthy, G. (2011). Commensal microbiota and myelin autoantigen cooperate to trigger autoimmune demyelination. *Nature* **479**, 538–541. doi:10.1038/nature10554
- Bethell, G., Wilkinson, D., Fawcner-Corbett, D., Mesa, A., Shukla, R., Edgar, D. and Kenny, S. (2016). Enteric nervous system stem cells associated with thickened extrinsic fibers in short segment aganglionic Hirschsprung's disease gut are absent in the total colonic and intestinal variants of disease. *J. Pediatr. Surg.* **51**, 1581–1584. doi:10.1016/j.jpedsurg.2016.06.006
- Bilder, D., Ong, K., Hsi, T. C., Adiga, K. and Kim, J. (2021). Tumour-host interactions through the lens of *Drosophila*. *Nat. Rev. Cancer* **21**, 687–700. doi:10.1038/s41568-021-00387-5
- Birse, R. T., Choi, J., Reardon, K., Rodriguez, J., Graham, S., Diop, S., Ocorr, K., Bodmer, R. and Oldham, S. (2010). High-fat-diet-induced obesity and heart dysfunction are regulated by the TOR pathway in *Drosophila*. *Cell Metab.* **12**, 533–544. doi:10.1016/j.cmet.2010.09.014
- Biteau, B. and Jasper, H. (2011). EGF signaling regulates the proliferation of intestinal stem cells in *Drosophila*. *Development* **138**, 1045–1055. doi:10.1242/dev.056671
- Biteau, B., Hochmuth, C. E. and Jasper, H. (2011). Maintaining tissue homeostasis: dynamic control of somatic stem cell activity. *Cell Stem Cell* **9**, 402–411. doi:10.1016/j.stem.2011.10.004
- Brierley, D. I., Holt, M. K., Singh, A., De Araujo, A., Mcdougale, M., Vergara, M., Afaghani, M. H., Lee, S. J., Scott, K., Maske, C. et al. (2021). Central and peripheral GLP-1 systems independently suppress eating. *Nat. Metab.* **3**, 258–273. doi:10.1038/s42255-021-00344-4
- Broderick, N. A., Buchon, N. and Lemaître, B. (2014). Microbiota-induced changes in *drosophila melanogaster* host gene expression and gut morphology. *mBio* **5**, e01117–e01114. doi:10.1128/mBio.01117-14
- Buchanan, K. L., Rupprecht, L. E., Sahasrabudhe, A., Kaelberer, M. M., Klein, M., Villalobos, J., Liu, W. W., Yang, A., Gelman, J., Park, S. et al. (2022). A gut sensor for sugar preference. *bioRxiv*. doi:10.1101/2020.03.06.981365
- Buchanan, K. L., Rupprecht, L. E., Kaelberer, M., Sahasrabudhe, A., Klein, M. E., Villalobos, J. A., Liu, W. W., Yang, A., Gelman, J., Park, S. et al. (2022). The preference for sugar over sweetener depends on a gut sensor cell. *Nat. Neurosci.* **25**, 191–200. doi:10.1038/s41593-021-00982-7
- Buchon, N., Broderick, N. A., Kuraishi, T. and Lemaître, B. (2010). *Drosophila* EGFR pathway coordinates stem cell proliferation and gut remodeling following infection. *BMC Biol.* **8**, 152. doi:10.1186/1741-7007-8-152
- Buckley, M. M., O'Brien, R., Brosnan, E., Ross, R. P., Stanton, C., Buckley, J. M. and O'malley, D. (2020). Glucagon-like peptide-1 secreting I-cells coupled to sensory nerves translate microbial signals to the host rat nervous system. *Front. Cell Neurosci.* **14**, 95. doi:10.3389/fncel.2020.00095
- Cai, X. T., Li, H., Borch Jensen, M., Maksoud, E., Borneo, J., Liang, Y., Quake, S. R., Luo, L., Haghighi, P. and Jasper, H. (2021). Gut cytokines modulate olfaction through metabolic reprogramming of glia. *Nature* **596**, 97–102. doi:10.1038/s41586-021-03756-0
- Carvalho-Santos, Z., Cardoso-Figueiredo, R., Elias, A. P., Tastekin, I., Baltazar, C. and Ribeiro, C. (2020). Cellular metabolic reprogramming controls sugar appetite in *Drosophila*. *Nat. Metabolism* **2**, 958–973. doi:10.1038/s42255-020-0266-x
- Centanin, L., Dekanty, A., Romero, N., Irisarri, M., Gorr, T. A. and Wappner, P. (2008). Cell autonomy of HIF effects in *Drosophila*: tracheal cells sense hypoxia and induce terminal branch sprouting. *Dev. Cell* **14**, 547–558. doi:10.1016/j.devcel.2008.01.020
- Centanin, L., Gorr, T. A. and Wappner, P. (2010). Tracheal remodelling in response to hypoxia. *J. Insect Physiol.* **56**, 447–454. doi:10.1016/j.jinsphys.2009.05.008
- Cersosimo, M. G., Raina, G. B., Pecci, C., Pellene, A., Calandra, C. R., Gutiérrez, C., Micheli, F. E. and Benarroch, E. E. (2013). Gastrointestinal manifestations in Parkinson's disease: prevalence and occurrence before motor symptoms. *J. Neurol.* **260**, 1332–1338. doi:10.1007/s00415-012-6801-2
- Chaidez, V., Hansen, R. L. and Hertz-Picciotto, I. (2014). gastrointestinal problems in children with autism, developmental delays or typical development. *J. Autism Dev. Disord.* **44**, 1117–1127. doi:10.1007/s10803-013-1973-x
- Chakrabarti, S., Poidevin, M. and Lemaître, B. (2014). The *Drosophila* MAPK p38c regulates oxidative stress and lipid homeostasis in the intestine. *PLoS Genet.* **10**, e1004659. doi:10.1371/journal.pgen.1004659
- Chakrabarti, S., Dudzic, J. P., Li, X., Collas, E. J., Boquete, J. P. and Lemaître, B. (2016). Remote control of intestinal stem cell activity by haemocytes in *Drosophila*. *PLoS Genet.* **12**, e1006089. doi:10.1371/journal.pgen.1006089
- Chang, J., Leong, R. W., Wasinger, V. C., Ip, M., Yang, M. and Phan, T. G. (2017). Impaired intestinal permeability contributes to ongoing bowel symptoms in patients with inflammatory bowel disease and mucosal healing. *Gastroenterology* **153**, 723–731. doi:10.1053/j.gastro.2017.05.056
- Charroux, B., Capo, F., Kurz, C. L., Peslier, S., Chaduli, D., Viallat-Lieutaud, A. and Royet, J. (2018). Cytosolic and secreted peptidoglycan-degrading enzymes in *Drosophila* respectively control local and systemic immune responses to microbiota. *Cell Host Microbe* **23**, 215–228. doi:10.1016/j.chom.2017.12.007
- Chassaing, B., Ley, R. E. and Gewirtz, A. T. (2014). Intestinal epithelial cell toll-like receptor 5 regulates the intestinal microbiota to prevent low-grade inflammation and metabolic syndrome in mice. *Gastroenterology* **147**, 1363–1377. doi:10.1053/j.gastro.2014.08.033
- Chassaing, B., Koren, O., Goodrich, J. K., Poole, A. C., Srinivasan, S., Ley, R. E. and Gewirtz, A. T. (2015). Dietary emulsifiers impact the mouse gut microbiota promoting colitis and metabolic syndrome. *Nature* **519**, 92–96. doi:10.1038/nature14232
- Chaston, J. M., Newell, P. D. and Douglas, A. E. (2014). Metagenome-wide association of microbial determinants of host phenotype in *Drosophila melanogaster*. *mBio* **5**, e01631–e01614. doi:10.1128/mBio.01631-14
- Chatterjee, N. and Perrimon, N. (2021). What fuels the fly: Energy metabolism in *Drosophila* and its application to the study of obesity and diabetes. *Sci. Adv.* **7**, eabg4336. doi:10.1126/sciadv.abg4336
- Chen, J., Xu, N., Wang, C., Huang, P., Huang, H., Jin, Z., Yu, Z., Cai, T., Jiao, R. and Xi, R. (2018). Transient Scute activation via a self-stimulatory loop directs enteroendocrine cell pair specification from self-renewing intestinal stem cells. *Nat. Cell Biol.* **20**, 152–161. doi:10.1038/s41556-017-0020-0
- Cognigni, P., Bailey, A. P. and Miguel-Aliaga, I. (2011). Enteric neurons and systemic signals couple nutritional and reproductive status with intestinal homeostasis. *Cell Metab.* **13**, 92–104. doi:10.1016/j.cmet.2010.12.010
- Colombani, J. and Andersen, D. S. (2020). The *Drosophila* gut: a gatekeeper and coordinator of organism fitness and physiology. *Wiley Interdiscip. Rev. Dev. Biol.* **9**, e378. doi:10.1002/wdev.378
- Consuegra, J., Grenier, T., Akherraz, H., Rahioui, I., Gervais, H., Da Silva, P. and Leulier, F. (2020). Metabolic Cooperation among Commensal Bacteria Supports *Drosophila* Juvenile Growth under Nutritional Stress. *iScience* **23**, 101232. doi:10.1016/j.isci.2020.101232
- Cordero, J. B., Stefanatos, R. K., Myant, K., Vidal, M. and Sansom, O. J. (2012a). Non-autonomous crosstalk between the Jak/Stat and Egr pathways mediates Apc1-driven intestinal stem cell hyperplasia in the *Drosophila* adult midgut. *Development* **139**, 4524–4535. doi:10.1242/dev.078261
- Cordero, J. B., Stefanatos, R. K., Scopelliti, A., Vidal, M. and Sansom, O. J. (2012b). Inducible progenitor-derived Wingless regulates adult midgut regeneration in *Drosophila*. *EMBO J.* **31**, 3901–3917. doi:10.1038/emboj.2012.248



- Cordero, J. B., Ridgway, R. A., Valeri, N., Nixon, C., Frame, M. C., Muller, W. J., Vidal, M. and Sansom, O. J. (2014). c-Src drives intestinal regeneration and transformation. *EMBO J.* **33**, 1474-1491.
- Dai, X., Zhou, E., Yang, W., Zhang, X., Zhang, W. and Rao, Y. (2019). D-Serine made by serine racemase in Drosophila intestine plays a physiological role in sleep. *Nat. Commun.* **10**, 1986. doi:10.1038/s41467-019-09544-9
- Dai, Z., Li, D., Du, X., Ge, Y., Hursh, D. A. and Bi, X. (2020). Drosophila Caliban preserves intestinal homeostasis and lifespan through regulating mitochondrial dynamics and redox state in enterocytes. *PLoS Genet.* **16**, e1009140. doi:10.1371/journal.pgen.1009140
- Danguir, J. and Nicolaidis, S. (1979). Dependence of sleep on nutrients' availability. *Physiol. Behav.* **22**, 735-740. doi:10.1016/0031-9384(79)90240-3
- Debosch, B. J., Kluth, O., Fujiwara, H., Schürmann, A. and Moley, K. (2014). Early-onset metabolic syndrome in mice lacking the intestinal uric acid transporter SLC2A9. *Nat. Commun.* **5**, 4642. doi:10.1038/ncomms5642
- Degirmenci, B., Valenta, S., Dimitrieva, S., Hausmann, G. and Basler, K. (2018). GLI1-expressing mesenchymal cells form the essential Wnt-secreting niche for colon stem cells. *Nature* **558**, 449-453. doi:10.1038/s41586-018-0190-3
- Del Toro, R., Prahst, C., Mathivet, T., Siegfried, G., Kaminker, J. S., Larrivee, B., Breant, C., Duarte, A., Takakura, N., Fukamizu, A. et al. (2010). Identification and functional analysis of endothelial tip cell-enriched genes. *Blood* **116**, 4025-4033. doi:10.1182/blood-2010-02-270819
- Deng, B., Li, Q., Liu, X., Cao, Y., Li, B., Qian, Y., Xu, R., Mao, R., Zhou, E., Zhang, W. et al. (2019). Chemoconnectomics: revealing chemical transmission in Drosophila. *Neuron* **101**, 876-893. doi:10.1016/j.neuron.2019.01.045
- Ding, G., Xiang, X., Hu, Y., Xiao, G., Chen, Y., Binari, R., Comjean, A., Li, J., Rushworth, E., Fu, Z. et al. (2021). Coordination of tumor growth and host wasting by tumor-derived Upd3. *Cell Rep* **36**, 109553. doi:10.1016/j.celrep.2021.109553
- Dow, J. A. T. and Davies, S. A. (2001). The *Drosophila melanogaster* malpighian tubule. *Adv. Insect Physiol.* **28**, 1-83. doi:10.1016/S0065-2806(01)28008-4
- Drokhlyansky, E., Smillie, C. S., Van Wittenbergh, N., Ericsson, M., Griffin, G. K., Eraslan, G., Dionne, D., Cuoco, M. S., Goder-Reiser, M. N., Sharova, T. et al. (2020). The human and mouse enteric nervous system at single-cell resolution. *Cell* **182**, 1606-1622. doi:10.1016/j.cell.2020.08.003
- Dus, M., Lai, J. S., Gunapala, K. M., Min, S., Tayler, T. D., Hergarden, A. C., Geraud, E., Joseph, C. M. and Suh, G. S. (2015). Nutrient sensor in the brain directs the action of the brain-gut axis in drosophila. *Neuron* **87**, 139-151. doi:10.1016/j.neuron.2015.05.032
- Fantin, A., Vieira, J. M., Gestri, G., Denti, L., Schwarz, Q., Prykhozij, S., Peri, F., Wilson, S. W. and Ruhrberg, C. (2010). Tissue macrophages act as cellular chaperones for vascular anastomosis downstream of VEGF-mediated endothelial tip cell induction. *Blood* **116**, 829-840. doi:10.1182/blood-2009-12-257832
- Fearon, K., Strasser, F., Anker, S. D., Bosaeus, I., Bruera, E., Fainsinger, R. L., Jatoti, A., Loprinz, C., Macdonald, N., Mantovani, G. et al. (2011). Definition and classification of cancer cachexia: an international consensus. *Lancet Oncol.* **12**, 489-495. doi:10.1016/S1470-2045(10)70218-7
- Ferguson, M. and Foley, E. (2021). Microbial recognition regulates intestinal epithelial growth in homeostasis and disease. *FEBS J.* doi:10.1111/febs.15910
- Figuerola-Clairevega, A. and Bildel, D. (2015). Malignant Drosophila tumors interrupt insulin signaling to induce cachexia-like wasting. *Dev. Cell* **33**, 47-55. doi:10.1016/j.devcel.2015.03.001
- Gehart, H., Van Es, J. H., Hamer, K., Beumer, J., Kretschmar, K., Dekkers, J. F., Rios, A. and Clevers, H. (2019). Identification of enteroendocrine regulators by real-time single-cell differentiation mapping. *Cell* **176**, 1158-1173. doi:10.1016/j.cell.2018.12.029
- Ghabrial, A., Luschnig, S., Metzstein, M. M. and Krasnow, M. A. (2003). Branching morphogenesis of the *Drosophila* tracheal system. *Annu. Rev. Cell Dev. Biol.* **19**, 623-647. doi:10.1146/annurev.cellbio.19.031403.160043
- Gomez-Nguyen, A., Basson, A. R., Dark-Fleury, L., Hsu, K., Osme, A., Menghini, P., Pizarro, T. T. and Cominelli, F. (2021). *Parabacteroides distasonis* induces depressive-like behavior in a mouse model of Crohn's disease. *Brain Behav. Immun.* **98**, 245-250. doi:10.1016/j.bbi.2021.08.218
- Gregorieff, A., Pinto, D., Begthel, H., Destree, O., Kielman, M. and Clevers, H. (2005). Expression pattern of Wnt signaling components in the adult intestine. *Gastroenterology* **129**, 626-638. doi:10.1016/j.gastro.2005.06.007
- Gregorieff, A., Liu, Y., Inanlou, M. R., Khomchuk, Y. and Wrana, J. L. (2015). Yap-dependent reprogramming of Lgr5(+) stem cells drives intestinal regeneration and cancer. *Nature* **526**, 715-718. doi:10.1038/nature15382
- Greicius, G., Kabiri, Z., Sigmundsson, K., Liang, C., Bunte, R., Singh, M. K. and Virshup, D. M. (2018). PDGFR $\alpha$  pericyptal stromal cells are the critical source of Wnts and RSP03 for murine intestinal stem cells in vivo. *Proc. Natl. Acad. Sci. USA* **115**, E3173-E3181. doi:10.1073/pnas.1713510115
- Gribble, F. M. and Reimann, F. (2016). Enteroendocrine Cells: Chemosensors in the Intestinal Epithelium. *Annu. Rev. Physiol.* **78**, 277-299. doi:10.1146/annurev-physiol-021115-105439
- Grifoni, D., Sollazzo, M., Fontana, E., Froidi, F. and Pession, A. (2015). Multiple strategies of oxygen supply in Drosophila malignancies identify tracheogenesis as a novel cancer hallmark. *Sci. Rep.* **5**, 9061. doi:10.1038/srep09061
- Guillermin, O., Angelis, N., Sidor, C. M., Ridgway, R., Baulies, A., Kucharska, A., Antas, P., Rose, M. R., Cordero, J., Sansom, O. et al. (2021). Wnt and Src signals converge on YAP-TEAD to drive intestinal regeneration. *EMBO J.* **40**, e105770. doi:10.15252/embj.202105770
- Guo, Z. and Ohlstein, B. (2015). Bidirectional Notch signaling regulates Drosophila intestinal stem cell multipotency. *Science* **350**, aab0988. doi:10.1126/science.aab0988
- Guo, Z., Driver, I. and Ohlstein, B. (2013). Injury-induced BMP signaling negatively regulates Drosophila midgut homeostasis. *J. Cell Biol.* **201**, 945-961. doi:10.1083/jcb.201302049
- Guo, L., Karpac, J., Tran, S. L. and Jasper, H. (2014). PGRP-SC2 promotes gut immune homeostasis to limit commensal Dysbiosis and extend lifespan. *Cell* **156**, 109-122. doi:10.1016/j.cell.2013.12.018
- Guo, X., Lv, J. and Xi, R. (2021). The specification and function of enteroendocrine cells in *Drosophila* and mammals: a comparative review. *FEBS J.* doi:10.1111/febs.16067
- Gutierrez, E., Wiggins, D., Fielding, B. and Gould, A. P. (2007). Specialized hepatocyte-like cells regulate Drosophila lipid metabolism. *Nature* **445**, 275-280. doi:10.1038/nature05382
- Hadjieconomou, D., King, G., Gaspar, P., Mineo, A., Blackie, L., Ameku, T., Studd, C., De Mendoza, A., Diaio, F., White, B. H. et al. (2020). Enteric neurons increase maternal food intake during reproduction. *Nature* **587**, 455-459. doi:10.1038/s41586-020-2866-8
- Han, H., Pan, C., Liu, C., Lv, X., Yang, X., Xiong, Y., Lu, Y., Wu, W., Han, J., Zhou, Z. et al. (2015). Gut-neuron interaction via Hh signaling regulates intestinal progenitor cell differentiation in Drosophila. *Cell Discov.* **1**, 15006. doi:10.1038/celldisc.2015.6
- Hanahan, D. and Weinberg, R. A. (2000). The hallmarks of cancer. *Cell* **100**, 57-70. doi:10.1016/S0092-8674(00)81683-9
- Harrison, E., Lal, S. and McLaughlin, J. T. (2013). Enteroendocrine cells in gastrointestinal pathophysiology. *Curr. Opin. Pharmacol.* **13**, 941-945. doi:10.1016/j.coph.2013.09.012
- He, L., Si, G., Huang, J., Samuel, A. D. T. and Perrimon, N. (2018). Mechanical regulation of stem-cell differentiation by the stretch-activated Piezo channel. *Nature* **555**, 103-106. doi:10.1038/nature25744
- Hirabayashi, S., Baranski, T. J. and Cagan, R. L. (2013). Transformed Drosophila cells evade diet-mediated insulin resistance through wingless signaling. *Cell* **154**, 664-675. doi:10.1016/j.cell.2013.06.030
- Holloway, E. M., Czerwinski, M., Tsai, Y. H., Wu, J. H., Wu, A., Childs, C. J., Walton, K. D., Sweet, C. W., Yu, Q., Glass, I. et al. (2021). Mapping development of the human intestinal niche at single-cell resolution. *Cell Stem Cell* **28**, 568-580. doi:10.1016/j.stem.2020.11.008
- Hua, R., Wang, X., Chen, X., Wang, X., Huang, P., Li, P., Mei, W. and Li, H. (2018). Calretinin neurons in the midline thalamus modulate starvation-induced arousal. *Curr. Biol.* **28**, 3948-3959. doi:10.1016/j.cub.2018.11.020
- Hudry, B., Khadayate, S. and Miguel-Aliaga, I. (2016). The sexual identity of adult intestinal stem cells controls organ size and plasticity. *Nature* **530**, 344-348. doi:10.1038/nature16953
- Hudry, B., De Goeij, E., Mineo, A., Gaspar, P., Hadjieconomou, D., Studd, C., Mokochinski, J. B., Kramer, H. B., Plaçais, P. Y., Preat, T. et al. (2019). Sex differences in intestinal carbohydrate metabolism promote food intake and sperm maturation. *Cell* **178**, 901-918. doi:10.1016/j.cell.2019.07.029
- Hung, R. J., Hu, Y., Kirchner, R., Liu, Y., Xu, C., Comjean, A., Tattikota, S. G., Li, F., Song, W., Ho Sui, S. et al. (2020). A cell atlas of the adult Drosophila midgut. *Proc. Natl. Acad. Sci. USA* **117**, 1514-1523. doi:10.1073/pnas.1916820117
- Ippolito, C., Colucci, R., Segnani, C., Errede, M., Girolamo, F., Virgintino, D., Dolfi, A., Tirota, E., Bucciantini, P., Di Candio, G. et al. (2016). Fibrotic and vascular remodelling of colonic wall in patients with active ulcerative colitis. *J. Crohns. Colitis.* **10**, 1194-1204. doi:10.1093/ecco-ccj/cjw076
- Ishibashi, F., Shimizu, H., Nakata, T., Fujii, S., Suzuki, K., Kawamoto, A., Anzai, S., Kuno, R., Nagata, S., Ito, G. et al. (2018). Contribution of ATOH1+ cells to the homeostasis, repair, and tumorigenesis of the colonic epithelium. *Stem Cell Reports* **10**, 27-42. doi:10.1016/j.stemcr.2017.11.006
- Jacobson, A., Yang, D., Vella, M. and Chiu, I. M. (2021). The intestinal neuro-immune axis: crosstalk between neurons, immune cells, and microbes. *Mucosal Immunol.* **14**, 555-565. doi:10.1038/s41385-020-00368-1
- Jardé, T., Chan, W. H., Rossello, F. J., Kaur Kahlon, T., Theocharous, M., Kurian Arackal, T., Flores, T., Giraud, M., Richards, E., Chan, E. et al. (2020). Mesenchymal niche-derived neuregulin-1 drives intestinal stem cell proliferation and regeneration of damaged epithelium. *Cell Stem Cell* **27**, 646-662. doi:10.1016/j.stem.2020.06.021
- Jetten, N., Verbruggen, S., Gijbels, M. J., Post, M. J., De Winther, M. P. and Donners, M. M. (2014). Anti-inflammatory M2, but not pro-inflammatory M1 macrophages promote angiogenesis in vivo. *Angiogenesis* **17**, 109-118. doi:10.1007/s10456-013-9381-6
- Jiang, H., Patel, P. H., Kohlmaier, A., Grenley, M. O., McEwen, D. G. and Edgar, B. A. (2009). Cytokine/Jak/Stat signaling mediates regeneration and homeostasis in the Drosophila midgut. *Cell* **137**, 1343-1355. doi:10.1016/j.cell.2009.05.014
- Jiang, H., Grenley, M. O., Bravo, M. J., Blumhagen, R. Z. and Edgar, B. A. (2011). EGFR/Ras/MAPK signaling mediates adult midgut epithelial homeostasis and



- regeneration in *Drosophila*. *Cell Stem Cell* **8**, 84-95. doi:10.1016/j.stem.2010.11.026
- Jiang, H., Tian, A. and Jiang, J. (2016). Intestinal stem cell response to injury: lessons from *Drosophila*. *Cell. Mol. Life Sci.* **73**, 3337-3349. doi:10.1007/s00018-016-2235-9
- Johnson, P., Richard, C., Ravid, A., Spencer, L., Pinto, E., Hanna, M., Cohen, Z. and McLeod, R. (2004). Female infertility after ileal pouch-anal anastomosis for ulcerative colitis. *Dis. Colon Rectum* **47**, 1119-1126. doi:10.1007/s10350-004-0570-7
- Jugder, B.-E., Kamareddine, L. and Watnick, P. I. (2021). Microbiota-derived acetate activates intestinal innate immunity via the Tip60 histone acetyltransferase complex. *Immunity* **54**, 1683-1697. doi:10.1016/j.immuni.2021.05.017
- Kaliannan, K., Hamarneh, S. R., Economopoulos, K. P., Nasrin Alam, S., Moaven, O., Patel, P., Malo, N. S., Ray, M., Abtahi, S. M., Muhammad, N. et al. (2013). Intestinal alkaline phosphatase prevents metabolic syndrome in mice. *Proc. Natl Acad. Sci. USA* **110**, 7003-7008. doi:10.1073/pnas.1220180110
- Kamareddine, L., Robins, W. P., Berkey, C. D., Mekalanos, J. J. and Watnick, P. I. (2018). The *Drosophila* immune deficiency pathway modulates enteroendocrine function and host metabolism. *Cell Metab.* **28**, 449-462. doi:10.1016/j.cmet.2018.05.026
- Karpac, J., Biteau, B. and Jasper, H. (2013). Misregulation of an adaptive metabolic response contributes to the age-related disruption of lipid homeostasis in *Drosophila*. *Cell Rep* **4**, 1250-1261. doi:10.1016/j.celrep.2013.08.004
- Katajisto, P., Vaahomeri, K., Ekman, N., Ventelä, E., Ristimäki, A., Bardeesy, N., Feil, R., Depinho, R. A. and Mäkelä, T. P. (2008). LKB1 signaling in mesenchymal cells required for suppression of gastrointestinal polyposis. *Nat. Genet.* **40**, 455-459. doi:10.1038/ng.98
- Keene, A. C., Duboué, E. R., McDonald, D. M., Dus, M., Suh, G. S., Waddell, S. and Blau, J. (2010). Clock and cycle limit starvation-induced sleep loss in *Drosophila*. *Curr. Biol.* **20**, 1209-1215. doi:10.1016/j.cub.2010.05.029
- Kenmoku, H., Ishikawa, H., Ote, M., Kuraiishi, T. and Kurata, S. (2016). A subset of neurons controls the permeability of the peritrophic matrix and midgut structure in *Drosophila* adults. *J. Exp. Biol.* **219**, 2331-2339.
- Kim, J.-E., Fei, L., Yin, W.-C., Coquenlorge, S., Rao-Bhatia, A., Zhang, X., Shi, S. S. W., Lee, J. H., Hahn, N. A., Rizvi, W. et al. (2020). Single cell and genetic analyses reveal conserved populations and signaling mechanisms of gastrointestinal stromal niches. *Nat. Commun.* **11**, 334. doi:10.1038/s41467-019-14058-5
- Kim, B., Kanai, M. I., Oh, Y., Kyung, M., Kim, E. K., Jang, I. H., Lee, J. H., Kim, S. G., Suh, G. S. B. and Lee, W. J. (2021a). Response of the microbiome-gut-brain axis in *Drosophila* to amino acid deficit. *Nature* **593**, 570-574. doi:10.1038/s41586-021-03522-2
- Kim, S. K., Tsao, D. D., Suh, G. S. B. and Miguel-Aliaga, I. (2021b). Discovering signaling mechanisms governing metabolism and metabolic diseases with *Drosophila*. *Cell Metab.* **33**, 1279-1292. doi:10.1016/j.cmet.2021.05.018
- Kinchen, J., Chen, H. H., Parikh, K., Antanaviciute, A., Jagielowicz, M., Fawcner-Corbett, D., Ashley, N., Cubitt, L., Mellado-Gomez, E., Attar, M. et al. (2018). Structural remodeling of the human colonic mesenchyme in inflammatory bowel disease. *Cell* **175**, 372-386. doi:10.1016/j.cell.2018.08.067
- Kockel, L., Griffin, C., Ahmed, Y., Fidelak, L., Rajan, A., Gould, E. P., Haigney, M., Ralston, B., Tercek, R. J., Galligan, L. et al. (2019). An interscholastic network to generate LexA enhancer trap lines in *Drosophila*. *G3 (Bethesda)* **9**, 2097-2106. doi:10.1534/g3.119.400105
- Kohlmaier, A., Fassnacht, C., Jin, Y., Reuter, H., Begum, J., Dutta, D. and Edgar, B. A. (2015). Src kinase function controls progenitor cell pools during regeneration and tumor onset in the *Drosophila* intestine. *Oncogene* **34**, 2371-2384. doi:10.1038/onc.2014.163
- Kubrak, O., Jensen, L., Ahrentlöv, N., Koyama, T., Malita, A., Naseem, M. T., Lassen, M., Nagy, S., Texada, M. J., Halberg, K. A. et al. (2022). The gut hormone Allatostatin C regulates food intake and metabolic homeostasis under nutrient stress. *Nat. Commun.* **13**, 692. doi:10.1038/s41467-022-28268-x
- Kwon, Y., Song, W., Droujinine, I. A., Hu, Y., Asara, J. M. and Perrimon, N. (2015). Systemic organ wasting induced by localized expression of the secreted insulin/IGF antagonist ImpL2. *Dev. Cell* **33**, 36-46. doi:10.1016/j.devcel.2015.02.012
- Larraufie, P., Roberts, G. P., MCGavigan, A. K., Kay, R. G., Li, J., Leiter, A., Melvin, A., Biggs, E. K., Ravn, P., Davy, K. et al. (2019). Important role of the GLP-1 axis for glucose homeostasis after bariatric surgery. *Cell Rep* **26**, 1399-1408. doi:10.1016/j.celrep.2019.01.047
- Lee, K. A., Cho, K. C., Kim, B., Jang, I. H., Nam, K., Kwon, Y. E., Kim, M., Hyeon, D. Y., Hwang, D., Seol, J. H. et al. (2018). Inflammation-modulated metabolic reprogramming is required for DUOX-dependent gut immunity in *Drosophila*. *Cell Host Microbe* **23**, 338-352. doi:10.1016/j.chom.2018.01.011
- Leitão-Gonçalves, R., Carvalho-Santos, Z., Francisco, A. P., Fioreze, G. T., Anjos, M., Baltazar, C., Elias, A. P., Itskov, P. M., Piper, M. D. W. and Ribeiro, C. (2017). Commensal bacteria and essential amino acids control food choice behavior and reproduction. *PLoS Biol.* **15**, e2000862. doi:10.1371/journal.pbio.2000862
- Li, Z., Zhang, Y., Han, L., Shi, L. and Lin, X. (2013). Trachea-derived dpp controls adult midgut homeostasis in *Drosophila*. *Dev. Cell* **24**, 133-143. doi:10.1016/j.devcel.2012.12.010
- Li, J., Song, J., Zaytseva, Y. Y., Liu, Y., Rychahou, P., Jiang, K., Starr, M. E., Kim, J. T., Harris, J. W., Yiannikouris, F. B. et al. (2016). An obligatory role for neurotensin in high-fat-diet-induced obesity. *Nature* **533**, 411-415. doi:10.1038/nature17662
- Li, Y., Pang, Z., Huang, H., Wang, C., Cai, T. and Xi, R. (2017). Transcription factor antagonism controls enteroendocrine cell specification from intestinal stem cells. *Sci. Rep.* **7**, 988. doi:10.1038/s41598-017-01138-z
- Li, H., Janssens, J., De Waegeneer, M., Saroja Kolluru, S., Davie, K., Gardeux, V., Saelens, W., David, F. P. A., Brbić, M., Spanier, K. et al. (2022). Fly Cell Atlas: A single-nucleus transcriptomic atlas of the adult fruit fly. *Science* **375**, eabk2432. doi:10.1126/science.abk2432
- Liehl, P., Blight, M., Vodovar, N., Boccard, F. and Lemaitre, B. (2006). Prevalence of local immune response against oral infection in a *Drosophila*/Pseudomonas infection model. *PLoS Pathog.* **2**, e56. doi:10.1371/journal.ppat.0020056
- Lim, S. Y., You, H., Lee, J., Lee, J., Lee, Y., Lee, K. A., Kim, B., Lee, J. H., Jeong, J., Jang, S. et al. (2021). Identification and characterization of GAL4 drivers that mark distinct cell types and regions in the *Drosophila* adult gut. *J. Neurogenet.* **35**, 33-44. doi:10.1080/01677063.2020.1853722
- Lin, E. Y., Li, J.-F., Gnatovskiy, L., Deng, Y., Zhu, L., Grzesik, D. A., Qian, H., Xue, X.-N. and Pollard, J. W. (2006). Macrophages regulate the angiogenic switch in a mouse model of breast cancer. *Cancer Res.* **66**, 11238-11246. doi:10.1158/0008-5472.CAN-06-1278
- Lin, G., Xu, N. and Xi, R. (2008). Paracrine Wingless signalling controls self-renewal of *Drosophila* intestinal stem cells. *Nature* **455**, 1119-1123. doi:10.1038/nature07329
- Lin, G., Xu, N. and Xi, R. (2010). Paracrine unpaired signaling through the JAK/STAT pathway controls self-renewal and lineage differentiation of *Drosophila* intestinal stem cells. *J. Mol. Cell Biol.* **2**, 37-49. doi:10.1093/jmcb/mjp028
- Linneweber, G. A., Jacobson, J., Busch, K. E., Hudry, B., Christov, C. P., Dormann, D., Yuan, M., Otani, T., Knust, E., De Bono, M. et al. (2014). Neuronal control of metabolism through nutrient-dependent modulation of tracheal branching. *Cell* **156**, 69-83. doi:10.1016/j.cell.2013.12.008
- Liu, J., Wang, W., Wang, L., Chen, S., Tian, B., Huang, K., Corrigan, C. J., Ying, S., Wang, W. and Wang, C. (2018). IL-33 Initiates vascular remodelling in hypoxic pulmonary hypertension by up-regulating HIF-1 $\alpha$  and VEGF expression in vascular endothelial cells. *EBioMedicine* **33**, 196-210. doi:10.1016/j.ebiom.2018.06.003
- Lourido, F., Quenti, D., Salgado-Canales, D. and Tobar, N. (2021). Domesless receptor loss in fat body tissue reverts insulin resistance induced by a high-sugar diet in *Drosophila melanogaster*. *Sci. Rep.* **11**, 3263. doi:10.1038/s41598-021-82944-4
- Lucas, T., Waisman, A., Ranjan, R., Roes, J., Krieg, T., Müller, W., Roers, A. and Eming, S. A. (2010). Differential roles of macrophages in diverse phases of skin repair. *J. Immunol.* **184**, 3964-3977. doi:10.4049/jimmunol.0903356
- Lund, A., Vilsbøll, T., Bagger, J. I., Holst, J. J. and Knop, F. K. (2011). The separate and combined impact of the intestinal hormones, GIP, GLP-1, and GLP-2, on glucagon secretion in type 2 diabetes. *Am. J. Physiol. Endocrinol. Metab.* **300**, E1038-E1046. doi:10.1152/ajpendo.00665.2010
- Luo, Y., Teng, X., Zhang, L., Chen, J., Liu, Z., Chen, X., Zhao, S., Yang, S., Feng, J. and Yan, X. (2019). CD146-HIF-1 $\alpha$  hypoxic reprogramming drives vascular remodeling and pulmonary arterial hypertension. *Nat. Commun.* **10**, 3551. doi:10.1038/s41467-019-11500-6
- Mallott, E. K., Borries, C., Koenig, A., Amato, K. R. and Lu, A. (2020). Reproductive hormones mediate changes in the gut microbiome during pregnancy and lactation in Phayre's leaf monkeys. *Sci. Rep.* **10**, 9961. doi:10.1038/s41598-020-66865-2
- Margolis, K. G., Cryan, J. F. and Mayer, E. A. (2021). The microbiota-gut-brain axis: from motility to mood. *Gastroenterology* **160**, 1486-1501. doi:10.1053/j.gastro.2020.10.066
- Mattila, J. and Hietakangas, V. (2017). Regulation of carbohydrate energy metabolism in *Drosophila melanogaster*. *Genetics* **207**, 1231-1253.
- Mayberry, J. F. and Weterman, I. T. (1986). European survey of fertility and pregnancy in women with Crohn's disease: a case control study by European collaborative group. *Gut* **27**, 821-825. doi:10.1136/gut.27.7.821
- Mccarthy, N., Manieri, E., Storm, E. E., Saadatpour, A., Luoma, A. M., Kapoor, V. N., Madha, S., Gaynor, L. T., Cox, C., Keerthivasan, S. et al. (2020). Distinct mesenchymal cell populations generate the essential intestinal BMP signaling gradient. *Cell Stem Cell* **26**, 391-402. doi:10.1016/j.stem.2020.01.008
- Medema, J. P. and Vermeulen, L. (2011). Microenvironmental regulation of stem cells in intestinal homeostasis and cancer. *Nature* **474**, 318-326. doi:10.1038/nature10212
- Mengoni, F., Salari, V., Kosenkova, I., Tsenov, G., Donadelli, M., Malerba, G., Bertini, G., Del Gallo, F. and Fabene, P. F. (2021). Gut microbiota modulates seizure susceptibility. *Epilepsia* **62**, e153-e157. doi:10.1111/epi.17009
- Meschi, E. and Delanoue, R. (2021). Adipokine and fat body in flies: connecting organs. *Mol. Cell. Endocrinol.* **533**, 111339. doi:10.1016/j.mce.2021.111339

- Micchelli, C. A. and Perrimon, N.** (2006). Evidence that stem cells reside in the adult *Drosophila* midgut epithelium. *Nature* **439**, 475-479. doi:10.1038/nature04371
- Miguel-Aliaga, I., Jasper, H. and Lemaitre, B.** (2018). Anatomy and physiology of the digestive tract of *Drosophila melanogaster*. *Genetics* **210**, 357-396. doi:10.1534/genetics.118.300224
- Mizuno, H., Fujikake, N., Wada, K. and Nagai, Y.** (2010).  $\alpha$ -Synuclein transgenic *Drosophila* as a model of Parkinson's disease and related synucleinopathies. *Parkinsons Dis.* **2011**, 212706.
- Modrzynska, J., Klein, C. F., Iversen, K., Bundgaard, H., Hartmann, B., Mose, M., Rittig, N., Møller, N., Holst, J. J. and Wewer Albrechtsen, N. J.** (2021). Plasma levels of glucagon but not GLP-1 are elevated in response to inflammation in humans. *Endocr. Connect* **10**, 205-213. doi:10.1530/EC-20-0590
- Morais, L. H., Schreiber, H. L. T. and Mazmanian, S. K.** (2021). The gut microbiota-brain axis in behaviour and brain disorders. *Nat. Rev. Microbiol.* **19**, 241-255. doi:10.1038/s41579-020-00460-0
- Musselman, L. P., Fink, J. L., Narzinski, K., Ramachandran, P. V., Hathiramani, S. S., Cagan, R. L. and Baranski, T. J.** (2011). A high-sugar diet produces obesity and insulin resistance in wild-type *Drosophila*. *Dis. Model. Mech.* **4**, 842-849. doi:10.1242/dmm.007948
- Myant, K. B., Cammareri, P., Mcghee, E. J., Ridgway, R. A., Huels, D. J., Cordero, J. B., Schwitala, S., Kalna, G., Ogg, E. L., Athineos, D. et al.** (2013a). ROS production and NF- $\kappa$ B activation triggered by RAC1 facilitate WNT-driven intestinal stem cell proliferation and colorectal cancer initiation. *Cell Stem Cell* **12**, 761-773. doi:10.1016/j.stem.2013.04.006
- Myant, K. B., Scopelliti, A., Haque, S., Vidal, M., Sansom, O. J. and Cordero, J. B.** (2013b). Rac1 drives intestinal stem cell proliferation and regeneration. *Cell Cycle* **12**, 2973-2977. doi:10.4161/cc.26031
- Na, J., Musselman, L. P., Pendse, J., Baranski, T. J., Bodmer, R., Ocorr, K. and Cagan, R.** (2013). A *Drosophila* model of high sugar diet-induced cardiomyopathy. *PLoS Genet.* **9**, e1003175. doi:10.1371/journal.pgen.1003175
- Naszai, M., Carroll, L. R. and Cordero, J. B.** (2015). Intestinal stem cell proliferation and epithelial homeostasis in the adult *Drosophila* midgut. *Insect Biochem. Mol. Biol.* **67**, 9-14. doi:10.1016/j.ibmb.2015.05.016
- Nauck, M. A., Bartels, E., Orskov, C., Ebert, R. and Creutzfeldt, W.** (1993). Additive insulinotropic effects of exogenous synthetic human gastric inhibitory polypeptide and glucagon-like peptide-1-(7-36) amide infused at near-physiological insulinotropic hormone and glucose concentrations. *J. Clin. Endocrinol. Metab.* **76**, 912-917.
- Ngo, S., Liang, J., Su, Y. H. and O'Brien, L. E.** (2020). Disruption of EGF feedback by intestinal tumors and neighboring cells in *Drosophila*. *Curr. Biol.* **30**, 1537-1546. doi:10.1016/j.cub.2020.01.082
- Nolan, D. J., Ginsberg, M., Israely, E., Palikuqi, B., Poulos, M. G., James, D., Ding, B. S., Schachterle, W., Liu, Y., Rosenwaks, Z. et al.** (2013). Molecular signatures of tissue-specific microvascular endothelial cell heterogeneity in organ maintenance and regeneration. *Dev. Cell* **26**, 204-219. doi:10.1016/j.devcel.2013.06.017
- Nozawa, K., Kawabata-Shoda, E., Doihara, H., Kojima, R., Okada, H., Mochizuki, S., Sano, Y., Inamura, K., Matsushime, H., Koizumi, T. et al.** (2009). TRPA1 regulates gastrointestinal motility through serotonin release from enterochromaffin cells. *Proc. Natl. Acad. Sci. USA* **106**, 3408-3413. doi:10.1073/pnas.0805323106
- O'Brien, L. E., Soliman, S. S., Li, X. and Bilder, D.** (2011). Altered modes of stem cell division drive adaptive intestinal growth. *Cell* **147**, 603-614. doi:10.1016/j.cell.2011.08.048
- Oh, Y., Lai, J. S., Min, S., Huang, H. W., Liberles, S. D., Ryoo, H. D. and Suh, G. S. B.** (2021). Periphery signals generated by Piezo-mediated stomach stretch and Neuromedin-mediated glucose load regulate the *Drosophila* brain nutrient sensor. *Neuron* **109**, 1979-1995. doi:10.1016/j.neuron.2021.04.028
- Ohlstein, B. and Spradling, A.** (2006). The adult *Drosophila* posterior midgut is maintained by pluripotent stem cells. *Nature* **439**, 470-474. doi:10.1038/nature04333
- Olds, W. H. and Xu, T.** (2014). Regulation of food intake by mechanosensory ion channels in enteric neurons. *Elife* **3**, e04402.
- Palikuqi, B., Nguyen, D.-H. T., Li, G., Schreiner, R., Pellegata, A. F., Liu, Y., Redmond, D., Geng, F., Lin, Y., Gómez-Salineró, J. M. et al.** (2020). Adaptable haemodynamic endothelial cells for organogenesis and tumorigenesis. *Nature* **585**, 426-432. doi:10.1038/s41586-020-2712-z
- Paredes, J. C., Welchman, D. P., Poidevin, M. and Lemaitre, B.** (2011). Negative regulation by amidase PGRPs shapes the *Drosophila* antibacterial response and protects the fly from innocuous infection. *Immunity* **35**, 770-779. doi:10.1016/j.immuni.2011.09.018
- Patel, P. H., Dutta, D. and Edgar, B. A.** (2015). Niche appropriation by *Drosophila* intestinal stem cell tumours. *Nat. Cell Biol.* **17**, 1182-1192. doi:10.1038/ncb3214
- Pedersen, N., Bortoli, A., Duricova, D., Inca, R. D., Panelli, M. R., Gisbert, J. P., Zoli, G., López-Sanromán, A., Castiglione, F., Riegler, G. et al.** (2013). The course of inflammatory bowel disease during pregnancy and postpartum: a prospective European ECCO-EpiCom Study of 209 pregnant women. *Aliment. Pharmacol. Ther.* **38**, 501-512. doi:10.1111/apt.12412
- Pereira, M. T., Malik, M., Nostro, J. A., Mahler, G. J. and Musselman, L. P.** (2018). Effect of dietary additives on intestinal permeability in both *Drosophila* and a human cell co-culture. *Dis. Model. Mech.* **11**, dmm034520. doi:10.1242/dmm.034520
- Perochon, J., Carroll, L. R. and Cordero, J. B.** (2018). Wnt Signalling in intestinal stem cells: lessons from mice and flies. *Genes (Basel)* **9**, 138. doi:10.3390/genes9030138
- Perochon, J., Yu, Y., Aughey, G. N., Medina, A. B., Southall, T. D. and Cordero, J. B.** (2021). Dynamic adult tracheal plasticity drives stem cell adaptation to changes in intestinal homeostasis in *Drosophila*. *Nat. Cell Biol.* **23**, 485-496. doi:10.1038/s41556-021-00676-z
- Pories, W. J., Swanson, M. S., Macdonald, K. G., Long, S. B., Morris, P. G., Brown, B. M., Barakat, H. A., Deramon, R. A., Israel, G., Dolezal, J. M. et al.** (1995). Who would have thought it? An operation proves to be the most effective therapy for adult-onset diabetes mellitus. *Ann. Surg.* **222**, 339-350; discussion 350-2. doi:10.1097/0000658-199509000-00011
- Reiff, T., Jacobson, J., Cognigni, P., Antonello, Z., Ballesta, E., Tan, K. J., Yew, J. Y., Dominguez, M. and Miguel-Aliaga, I.** (2015). Endocrine remodelling of the adult intestine sustains reproduction in *Drosophila*. *Elife* **4**, e06930. doi:10.7554/eLife.06930
- Ren, F., Wang, B., Yue, T., Yun, E. Y., Ip, Y. T. and Jiang, J.** (2010). Hippo signaling regulates *Drosophila* intestine stem cell proliferation through multiple pathways. *Proc. Natl. Acad. Sci. USA* **107**, 21064-21069. doi:10.1073/pnas.1012759107
- Rera, M., Clark, R. I. and Walker, D. W.** (2012). Intestinal barrier dysfunction links metabolic and inflammatory markers of aging to death in *Drosophila*. *Proc. Natl. Acad. Sci. USA* **109**, 21528-21533. doi:10.1073/pnas.1215849110
- Rey, S. and Semenza, G. L.** (2010). Hypoxia-inducible factor-1-dependent mechanisms of vascularization and vascular remodelling. *Cardiovasc. Res.* **86**, 236-242. doi:10.1093/cvr/cvq045
- Rothhammer, V., Borucki, D. M., Tjon, E. C., Takenaka, M. C., Chao, C.-C., Ardura-Fabregat, A., De Lima, K. A., Gutiérrez-Vázquez, C., Hewson, P., Staszewski, O. et al.** (2018). Microglial control of astrocytes in response to microbial metabolites. *Nature* **557**, 724-728. doi:10.1038/s41586-018-0119-x
- Roulis, M., Nikolaou, C., Kotsaki, E., Kaffe, E., Karagianni, N., Koliarakis, V., Salpea, K., Ragoussis, J., Aidinis, V., Martini, E. et al.** (2014). Intestinal myofibroblast-specific Tpl2-Cox-2-PGE2 pathway links innate sensing to epithelial homeostasis. *Proc. Natl. Acad. Sci. USA* **111**, E4658-E4667. doi:10.1073/pnas.1415762111
- Roulis, M., Kaklamanos, A., Scherthanner, M., Bielecki, P., Zhao, J., Kaffe, E., Frommelt, L. S., Qu, R., Knapp, M. S., Henriques, A. et al.** (2020). Paracrine orchestration of intestinal tumorigenesis by a mesenchymal niche. *Nature* **580**, 524-529. doi:10.1038/s41586-020-2166-3
- Rutsch, A., Kantsjö, J. B. and Ronchi, F.** (2020). The gut-brain axis: how microbiota and host inflammasome influence brain physiology and pathology. *Front. Immunol.* **11**, 604179. doi:10.3389/fimmu.2020.604179
- Saha, S., Aranda, E., Hayakawa, Y., Bhanja, P., Atay, S., Brodin, N. P., Li, J., Asfaha, S., Liu, L., Tailor, Y. et al.** (2016). Macrophage-derived extracellular vesicle-packaged WNTs rescue intestinal stem cells and enhance survival after radiation injury. *Nat. Commun.* **7**, 13096. doi:10.1038/ncomms13096
- Sanaki, Y., Nagata, R., Kizawa, D., Léopold, P. and Igaki, T.** (2020). Hyperinsulinemia drives epithelial tumorigenesis by abrogating cell competition. *Dev. Cell* **53**, 379-389. doi:10.1016/j.devcel.2020.04.008
- Sanchez Bosch, P., Makhijani, K., Herboso, L., Gold, K. S., Baginsky, R., Woodcock, K. J., Alexander, B., Kukar, K., Corcoran, S., Jacobs, T. et al.** (2019). Adult *Drosophila* lack hematopoiesis but rely on a blood cell reservoir at the respiratory epithelia to relay infection signals to surrounding tissues. *Dev. Cell* **51**, 787-803. doi:10.1016/j.devcel.2019.10.017
- Sansom, O. J., Reed, K. R., Hayes, A. J., Ireland, H., Brinkmann, H., Newton, I. P., Batlle, E., Simon-Assmann, P., Clevers, H., Nathke, I. S. et al.** (2004). Loss of *ApC* in vivo immediately perturbs Wnt signaling, differentiation, and migration. *Genes Dev.* **18**, 1385-1390. doi:10.1101/gad.287404
- Schroeder, B. O. and Bäckhed, F.** (2016). Signals from the gut microbiota to distant organs in physiology and disease. *Nat. Med.* **22**, 1079-1089. doi:10.1038/nm.4185
- Scopelliti, A., Bauer, C., Yu, Y., Zhang, T., Kruspig, B., Murphy, D. J., Vidal, M., Maddocks, O. D. K. and Cordero, J. B.** (2018). A neuronal relay mediates a nutrient responsive gut/fat body axis regulating energy homeostasis in adult *Drosophila*. *Cell Metab.* **29**, 269-284. doi:10.1016/j.cmet.2018.09.021
- Scopelliti, A., Bauer, C., Yu, Y., Zhang, T., Kruspig, B., Murphy, D. J., Vidal, M., Maddocks, O. D. K. and Cordero, J. B.** (2019). A neuronal relay mediates a nutrient responsive Gut/Fat body axis regulating energy homeostasis in adult *Drosophila*. *Cell Metab.* **29**, 269-284. doi:10.1016/j.cmet.2018.09.021
- Scopelliti, A., Cordero, J. B., Diao, F., Strathdee, K., White, B. H., Sansom, O. J. and Vidal, M.** (2014). Local control of intestinal stem cell homeostasis by enteroendocrine cells in the adult *Drosophila* midgut. *Curr. Biol.* **24**, 1199-1211. doi:10.1016/j.cub.2014.04.007
- Shao, J., Sheng, G. G., Mifflin, R. C., Powell, D. W. and Sheng, H.** (2006). Roles of myofibroblasts in prostaglandin E2-stimulated intestinal epithelial proliferation and angiogenesis. *Cancer Res.* **66**, 846-855. doi:10.1158/0008-5472.CAN-05-2606



- Shaw, R. L., Kohlmaier, A., Polesello, C., Veelken, C., Edgar, B. A. and Tapon, N. (2010). The Hippo pathway regulates intestinal stem cell proliferation during *Drosophila* adult midgut regeneration. *Development* **137**, 4147-4158. doi:10.1242/dev.052506
- Shoshkes-Carmel, M., Wang, Y. J., Wangenstein, K. J., Tóth, B., Kondo, A., Massasa, E. E., Itzkovitz, S. and Kaestner, K. H. (2018). Subepithelial telocytes are an important source of Wnts that supports intestinal crypts. *Nature* **557**, 242-246. doi:10.1038/s41586-018-0084-4
- Song, W., Cheng, D., Hong, S., Sappe, B., Hu, Y., Wei, N., Zhu, C., O'connor, M. B., Pissios, P. and Perrimon, N. (2017). Midgut-derived activin regulates glucagon-like action in the fat body and glycemic control. *Cell Metab.* **25**, 386-399. doi:10.1016/j.cmet.2017.01.002
- Song, W., Kir, S., Hong, S., Hu, Y., Wang, X., Binari, R., Tang, H. W., Chung, V., Banks, A. S., Spiegelman, B. et al. (2019). Tumor-derived ligands trigger tumor growth and host wasting via differential MEK activation. *Dev. Cell* **48**, 277-286. doi:10.1016/j.devcel.2018.12.003
- Song, W., Veenstra, J. A. and Perrimon, N. (2014). Control of lipid metabolism by tachykinin in *Drosophila*. *Cell Rep* **9**, 40-47. doi:10.1016/j.celrep.2014.08.060
- Staley, B. K. and Irvine, K. D. (2010). Warts and Yorkie mediate intestinal regeneration by influencing stem cell proliferation. *Curr. Biol.* **20**, 1580-1587. doi:10.1016/j.cub.2010.07.041
- Stzepourginski, I., Nigro, G., Jacob, J.-M., Dulauroy, S., Sansonetti, P. J., Eberl, G. and Peduto, L. (2017). CD34<sup>+</sup> mesenchymal cells are a major component of the intestinal stem cells niche at homeostasis and after injury. *Proc. Natl Acad. Sci. USA* **114**, E506-E513. doi:10.1073/pnas.1620059114
- Suh, H. N., Kim, M. J., Jung, Y. S., Lien, E. M., Jun, S. and Park, J. I. (2017). Quiescence Exit of Tert(+) Stem Cells by Wnt/ $\beta$ -Catenin is indispensable for intestinal regeneration. *Cell Rep* **21**, 2571-2584. doi:10.1016/j.celrep.2017.10.118
- Tamamouna, V., Rahman, M. M., Petersson, M., Charalambous, I., Kux, K., Mainor, H., Bolender, V., Isbilir, B., Edgar, B. A. and Pitsouli, C. (2021). Remodelling of oxygen-transporting tracheoles drives intestinal regeneration and tumorigenesis in *Drosophila*. *Nat. Cell Biol.* **23**, 497-510. doi:10.1038/s41556-021-00674-1
- Tan, H. E., Sisti, A. C., Jin, H., Vignovich, M., Villavicencio, M., Tsang, K. S., Goffer, Y. and Zuker, C. S. (2020). The gut-brain axis mediates sugar preference. *Nature* **580**, 511-516. doi:10.1038/s41586-020-2199-7
- Taniguchi, K., Wu, L. W., Grivennikov, S. I., De Jong, P. R., Lian, I., Yu, F. X., Wang, K., Ho, S. B., Boland, B. S., Chang, J. T. et al. (2015). A gp130-Src-YAP module links inflammation to epithelial regeneration. *Nature* **519**, 57-62. doi:10.1038/nature14228
- Tauber, J. M., Vanlandingham, P. A. and Zhang, B. (2011). Elevated levels of the vesicular monoamine transporter and a novel repetitive behavior in the *Drosophila* model of fragile X syndrome. *PLoS One* **6**, e27100. doi:10.1371/journal.pone.0027100
- Tauc, H. M., Rodriguez-Fernandez, I. A., Hackney, J. A., Pawlak, M., Ronnen Oron, T., Korzelius, J., Moussa, H. F., Chaudhuri, S., Modrusan, Z., Edgar, B. A. et al. (2021). Age-related changes in polycomb gene regulation disrupt lineage fidelity in intestinal stem cells. *Elife* **10**, e62250. doi:10.7554/eLife.62250
- Titos, I. and Rogulja, D. (2020). A gut-secreted peptide controls arousability through modulation of dopaminergic neurons in the brain. *bioRxiv* 2020.08.31.275552. doi:10.1101/2020.08.31.275552
- Tomic, G., Morrissey, E., Kozar, S., Ben-Moshe, S., Hoyle, A., Azzarelli, R., Kemp, R., Chilamakuri, C. S. R., Itzkovitz, S., Philpott, A. et al. (2018). Phospho-regulation of ATOH1 is required for plasticity of secretory progenitors and tissue regeneration. *Cell Stem Cell* **23**, 436-443. doi:10.1016/j.stem.2018.07.002
- Valenta, T., Degirmenci, B., Moor, A. E., Herr, P., Zimmerli, D., Moor, M. B., Hausmann, G., Cantù, C., Aguet, M. and Basler, K. (2016). Wnt ligands secreted by subepithelial mesenchymal cells are essential for the survival of intestinal stem cells and gut homeostasis. *Cell Rep.* **15**, 911-918. doi:10.1016/j.celrep.2016.03.088
- Vicent, D., Ilany, J., Kondo, T., Naruse, K., Fisher, S. J., Kisanuki, Y. Y., Bursell, S., Yanagisawa, M., King, G. L. and Kahn, C. R. (2003). The role of endothelial insulin signaling in the regulation of vascular tone and insulin resistance. *J. Clin. Invest.* **111**, 1373-1380. doi:10.1172/JCI15211
- Wan, Y., Zuo, T., Xu, Z., Zhang, F., Zhan, H., Chan, D., Leung, T. F., Yeoh, Y. K., Chan, F. K. L., Chan, R. et al. (2021). Underdevelopment of the gut microbiota and bacteria species as non-invasive markers of prediction in children with autism spectrum disorder. *Gut* **gutjnl-2020-324015**. doi:10.1136/gutjnl-2020-324015
- Wang, P., Jia, Y., Liu, T., Jan, Y. N. and Zhang, W. (2020). Visceral mechanosensing neurons control *Drosophila* feeding by using piezo as a sensor. *Neuron* **108**, 640-650. doi:10.1016/j.neuron.2020.08.017
- White, M. A., Bonfini, A., Wolfner, M. F. and Buchon, N. (2021). *Drosophila melanogaster* sex peptide regulates mated female midgut morphology and physiology. *Proc. Natl. Acad. Sci. USA* **118**, e2018112118. doi:10.1073/pnas.2018112118
- Wikoff, W. R., Anfora, A. T., Liu, J., Schultz, P. G., Lesley, S. A., Peters, E. C. and Siuzdak, G. (2009). Metabolomics analysis reveals large effects of gut microflora on mammalian blood metabolites. *Proc. Natl. Acad. Sci. USA* **106**, 3698-3703. doi:10.1073/pnas.0812874106
- Worthington, J. J., Reimann, F. and Gribble, F. M. (2018). Enteroendocrine cells-sensory sentinels of the intestinal environment and orchestrators of mucosal immunity. *Mucosal Immunol.* **11**, 3-20. doi:10.1038/mi.2017.73
- Xu, N., Wang, S. Q., Tan, D., Gao, Y., Lin, G. and Xi, R. (2011). EGFR, Wingless and JAK/STAT signaling cooperatively maintain *Drosophila* intestinal stem cells. *Dev. Biol.* **354**, 31-43. doi:10.1016/j.ydbio.2011.03.018
- Yoshinari, Y., Kosakamoto, H., Kamiyama, T., Hoshino, R., Matsuoka, R., Kondo, S., Tanimoto, H., Nakamura, A., Obata, F. and Niwa, R. (2021). The sugar-responsive enteroendocrine neuropeptide F regulates lipid metabolism through glucagon-like and insulin-like hormones in *Drosophila melanogaster*. *Nat. Commun.* **12**, 4818. doi:10.1038/s41467-021-25146-w
- Yu, Y., Huang, R., Ye, J., Zhang, V., Wu, C., Cheng, G., Jia, J. and Wang, L. (2016). Regulation of starvation-induced hyperactivity by insulin and glucagon signaling in adult *Drosophila*. *Elife* **5**, e15693. doi:10.7554/eLife.15693
- Yuan, Q., Xin, L., Han, S., Su, Y., Wu, R., Liu, X., Wuri, J., Li, R. and Yan, T. (2021). Lactulose improves neurological outcomes by repressing harmful bacteria and regulating inflammatory reactions in mice after stroke. *Front. Cell Infect. Microbiol.* **11**, 644448. doi:10.3389/fcimb.2021.644448
- Yui, S., Azzolin, L., Maimets, M., Pedersen, M. T., Fordham, R. P., Hansen, S. L., Larsen, H. L., Guiu, J., Alves, M. R. P., Rundsten, C. F. et al. (2018). YAP/TAZ-Dependent reprogramming of colonic epithelium links ECM remodeling to tissue regeneration. *Cell Stem Cell* **22**, 35-49. doi:10.1016/j.stem.2017.11.001
- Zeng, X. and Hou, S. X. (2015). Enteroendocrine cells are generated from stem cells through a distinct progenitor in the adult *Drosophila* posterior midgut. *Development* **142**, 644-653. doi:10.1242/dev.113357
- Zhang, T., Sun, P., Geng, Q., Fan, H., Gong, Y., Hu, Y., Shan, L., Sun, Y., Shen, W. and Zhou, Y. (2021). Disrupted spermatogenesis in a metabolic syndrome model: the role of vitamin A metabolism in the gut-testis axis. *Gut* **71**, 78-87. doi:10.1136/gutjnl-2020-323347
- Zhou, J. and Boutros, M. (2020). JNK-dependent intestinal barrier failure disrupts host-microbe homeostasis during tumorigenesis. *Proc. Natl. Acad. Sci. USA* **117**, 9401-9412. doi:10.1073/pnas.1913976117
- Zhou, F., Rasmussen, A., Lee, S. and Agaisse, H. (2013). The UPD3 cytokine couples environmental challenge and intestinal stem cell division through modulation of JAK/STAT signaling in the stem cell microenvironment. *Dev. Biol.* **373**, 383-393. doi:10.1016/j.ydbio.2012.10.023
- Zhou, J., Valentini, E. and Boutros, M. (2021). Microenvironmental innate immune signaling and cell mechanical responses promote tumor growth. *Dev. Cell* **56**, 1884-1899. doi:10.1016/j.devcel.2021.06.007
- Zipper, L., Jassmann, D., Burgmer, S., Görlich, B. and Reiff, T. (2020). Ecdysone steroid hormone remote controls intestinal stem cell fate decisions via the PPAR $\gamma$ -homolog Eip75B in *Drosophila*. *Elife* **9**, e55795. doi:10.7554/eLife.55795
- Zou, W. Y., Blutt, S. E., Zeng, X. L., Chen, M. S., Lo, Y. H., Castillo-Azofeifa, D., Klein, O. D., Shroyer, N. F., Donowitz, M. and Estes, M. K. (2018). Epithelial WNT ligands are essential drivers of intestinal stem cell activation. *Cell Rep* **22**, 1003-1015. doi:10.1016/j.celrep.2017.12.093
- Zugasti, O., Tavignot, R. and Royet, J. (2020). Gut bacteria-derived peptidoglycan induces a metabolic syndrome-like phenotype via NF- $\kappa$ B-dependent insulin/PI3K signaling reduction in *Drosophila* renal system. *Sci. Rep.* **10**, 14097. doi:10.1038/s41598-020-70455-7
